# Adaptive introgression of a visual preference gene

Matteo Rossi<sup>1</sup>, Alexander E. Hausmann<sup>1</sup>, Pepe Alcami<sup>1</sup>, Markus Moest<sup>2</sup>, Daniel Shane Wright<sup>1</sup>,  
Chi-Yun Kuo<sup>1,3</sup>, Daniela Lozano<sup>1,4</sup>, Arif Maulana<sup>1</sup>, Lina Melo-Flórez<sup>1,4</sup>, Geraldine Rueda-  
Muñoz<sup>1,4</sup>, Saoirse McMahon<sup>1</sup>, Mauricio Linares<sup>4</sup>, W. Owen McMillan<sup>3</sup>, Carolina Pardo-Díaz<sup>4</sup>,  
Camilo Salazar<sup>4</sup> & Richard M. Merrill<sup>1,3</sup>

Corresponding authors: [mrossi@rockefeller.edu](mailto:mrossi@rockefeller.edu) (M.R.) & [merrill@bio.lmu.de](mailto:merrill@bio.lmu.de) (R.M.M)

<sup>1</sup>Faculty of Biology, Ludwig Maximilian University, Munich, Germany. <sup>2</sup>Department of Ecology and Research Department for Limnology, Mondsee, University of Innsbruck, Innsbruck, Austria. <sup>3</sup>Smithsonian Tropical Research Institute, Gamboa, Panama. <sup>4</sup>Faculty of Natural Sciences, Universidad del Rosario, Bogota, Colombia.

**Visual preferences are important drivers of mate choice and sexual selection, but little is known of how they evolve at the genetic level. Here we take advantage of the diversity of bright warning patterns displayed by *Heliconius* butterflies, which are also used during mate choice. We show that two *Heliconius* species have evolved the same visual mating preferences for females with red patterns by exchanging genetic material through hybridization. Extensive behavioral experiments reveal that male preferences are associated with a genomic region of increased admixture between these two species. Variation in neural expression of *regucalcin1*, located within this introgressed region, correlates with visual preference across populations, and disruption of *regucalcin1* with CRISPR/Cas9 impairs courtship towards conspecific females, proving a direct link between gene and behavior. Our results support a role for hybridization during behavioral evolution, and show how visually-guided behaviors contributing to adaptation and speciation are encoded within the genome.**

Organisms often use color, and other visual cues, to attract and recognize suitable mates (*1*). The evolution of these cues is increasingly understood at the molecular level, providing insights into the nature and origin of genetic variation on which selection acts *e.g.*, (*2–7*). However, we know little of the genetic mechanisms underlying variation in the corresponding preferences, or

34 visually guided behaviors more broadly. Indeed, while progress has been made for other sensory  
35 modalities (and especially chemosensation, *e.g.*, (8–10)), genetic studies of visual preference  
36 evolution remain limited to the identification of relatively broad genomic regions containing tens  
37 or hundreds of genes, and/or are unable to distinguish between causal and correlated genetic  
38 changes (11–15). Although these studies have undoubtedly contributed to our understanding of  
39 population divergence, identifying the causal genes involved is key to uncovering how  
40 behavioral variation is generated during development and across evolutionary time.

41 *Heliconius* butterflies are well known for their diversity of bright warning patterns, which  
42 are also used as mating cues (16). Closely related taxa often display divergent wing patterns, and  
43 because males almost invariably prefer to court females that share their own color pattern, this  
44 contributes an important premating reproductive barrier between species *e.g.*, (17). While the  
45 genetics and evolutionary history of *Heliconius* color pattern variation is well understood (18–  
46 24), we know very little of the specific genetic mechanisms contributing to the evolution of the  
47 corresponding visual preference behaviors. Previously we identified three genomic regions  
48 controlling differences in male courtship behaviors between the closely-related sympatric species  
49 *H. cydno* and *H. melpomene*, which differ in color pattern (11). However, further fine mapping  
50 of this behavioral phenotype is impractical, and even the best supported of these behavioral  
51 quantitative trait loci (QTLs), which has also been explicitly linked to differences in visual  
52 preference (25), is associated with a confidence region containing 200 genes. Although patterns  
53 of neural gene expression highlight a number of candidates (26), the exact genes involved remain  
54 unknown.

55 Here we take advantage of the mimicry relations among three closely related *Heliconius*  
56 species to determine how genetic variation for visual preferences has evolved in relation to that  
57 of the corresponding color pattern cues. Whereas west of the Eastern Cordillera in the Andes  
58 coexisting *H. cydno* and *H. melpomene* differ in forewing color (being white and red  
59 respectively), on the eastern slopes *H. cydno* is replaced by its sister species *H. timareta*, which  
60 shares the red patterns of the local *H. melpomene* (Fig. 1A). Mimicry between these two red  
61 species is not the result of independent mutations, but adaptive introgression, whereby *H.*  
62 *timareta* acquired color pattern alleles following hybridization with *H. melpomene* (23, 24, 27).  
63 This presents an excellent opportunity to both i) test whether behavioral phenotypes can  
64 similarly evolve through the reassembly of existing genetic variants on a novel genomic

65 background, and ii) to isolate the causal genes. We identify a region of increased admixture  
 66 between *H. melpomene* and *H. timareta* that is strongly associated with parallel preferences for  
 67 red females in both species. We then leverage this finding alongside transcriptomic analysis and  
 68 genome-editing to identify a major effect gene underlying the evolution of visual preferences.  
 69

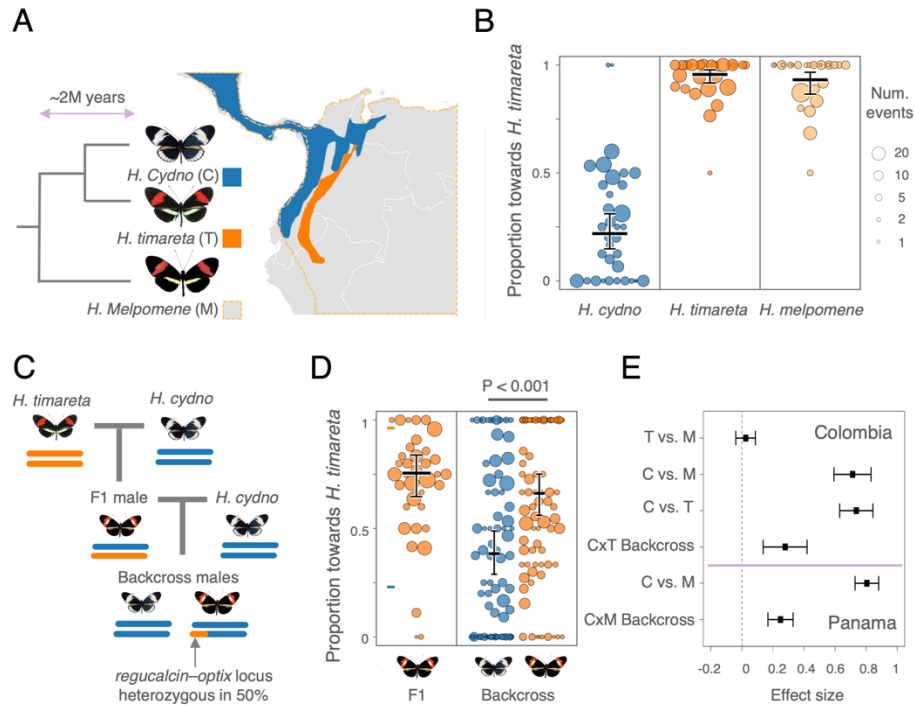

70  
 71  
 72 **Figure 1. Parallel visual preferences are controlled by the same genomic region in the *Heliconius***  
 73 ***melpomene-cydnio* group.** (A) *H. melpomene* (dotted orange line) co-occurs with *H. cydnio* (blue) in Central  
 74 America and South America to the west of the Eastern Cordillera in the Andes, while *H. melpomene* co-  
 75 occurs with *H. timareta* (orange) to the east of the Eastern Cordillera. *H. melpomene* and *H. timareta* share  
 76 red warning patterns even though the latter is more closely related to the white/yellow *H. cydnio*. (B)  
 77 Proportion of courtship time directed towards red *H. timareta* females relative to white *H. cydnio* females  
 78 by males of the three species. Point size is scaled to the number of total minutes a male responded to either  
 79 female type (a custom swarmplot was used to distribute dots horizontally). Estimated marginal means and  
 80 their 95% confidence intervals are displayed with black bars. (C) Crossing design for producing backcross  
 81 hybrid individuals to *H. cydnio* segregating at the behavioral QTL region on chromosome 18. (D) Relative  
 82 courtship time directed towards red *H. timareta* females by F1 hybrid and backcross to *H. cydnio* hybrid  
 83 males. Orange points represent individuals that are heterozygous (*i.e.*, ‘*cydnio-timareta*’) and blue points  
 84 represent individuals that are homozygous for *H. cydnio* alleles at the QTL peak/*optix* region on  
 85 chromosome 18. (E) Differences in estimated marginal means for relative courtship time between butterfly  
 86 types tested in Colombia (this study) and in Panama (9). T= *H. timareta*, M= *H. melpomene*, C= *H. cydnio*,  
 87 Backcross = backcross to *H. cydnio* hybrids.  
 88

## 89 **Evolution of parallel visual preference behaviors**

90 To explore the evolution of visually guided behaviors across the *melpomene-cydno* group we  
91 assayed mate preference for populations sampled across Colombia. Specifically, we tested *H.*  
92 *melpomene* and *H. timareta* males from the eastern slopes of the Eastern Cordillera, which both  
93 have a red forewing band, as well as *H. cydno* males from the western slopes of the Eastern  
94 Cordillera, which have a white or yellow forewing band. Male butterflies were simultaneously  
95 presented with a red *H. timareta* and a white *H. cydno* female in standardized trials. Males of the  
96 two red species showed a stronger preference for red females than the *H. cydno* males  
97 (differences in proportion courtship time towards red females: *H. timareta* - *H. cydno* = 0.737  
98 [0.630 – 0.844], *H. melpomene* - *H. cydno* = 0.713 [0.593 – 0.832];  $n = 87$ ,  $2\Delta\ln L = 99.8$ ,  $P \ll$   
99  $0.001$ ; Fig. 1B), but there was no difference in mate preference between the two red species  
100 (0.025 [-0.039 – 0.087]). We confirmed that preference differences between male *H. timareta*  
101 and *H. cydno* are largely based on visual cues by repeating our experiment, this time presenting  
102 males with two *H. cydno* females, where the forewings of one were artificially colored to match  
103 the red forewing of *H. timareta* (with respect to *Heliconius* color vision), and the wings of the  
104 other with a transparent marker as a control (*H. timareta* – *H. cydno* = 0.46 [0.36 – 0.56];  $n = 94$ ,  
105  $2\Delta\ln L = 53.7$ ,  $P \ll 0.001$ , Fig S1). Overall, these results closely mirror previous data for  
106 Panamanian populations of *H. cydno* and *H. melpomene* (11, 17), where the latter shows a much  
107 stronger preference for red females, and confirms that although *H. timareta* is more closely  
108 related to *H. cydno*, it shares the visual preference phenotype of *H. melpomene*.

## 109 110 **The same major effect locus contributes to red preference in *H. melpomene* and *H. timareta***

111 If introgression has contributed to this parallel behavioral evolution for females with red patterns,  
112 we would expect the same genomic locations to influence the preference behaviors of both *H.*  
113 *melpomene* and *H. timareta*. In other words, we expect that the alleles at the location of the *H.*  
114 *melpomene* x *H. cydno* QTLs also segregate with preference differences in crosses between *H.*  
115 *timareta* and *H. cydno*. Confirming this, we found that genotype at the end of chromosome 18 is  
116 a strong predictor of male preference in *H. timareta* x *H. cydno* hybrids. Specifically, backcross  
117 hybrid males that inherit an allele from *H. timareta* at the previously detected QTL peak spent  
118 more time courting red *H. timareta* than white *H. cydno* females, compared to their brothers that  
119 inherited two copies of the *H. cydno* alleles at the same location (differences in proportion

120 courtship time between males with ‘*cydno-timareta*’ and ‘*cydno-cydno*’ genotypes = 0.279  
121 [0.137 – 0.42];  $n = 157$ ,  $2\Delta\ln L = 14.02$ ,  $P = 0.00018$ ; Figs. 1C and D). Notably the effect size  
122 observed here is almost identical to that seen in hybrids between *H. cydno* and *H. melpomene*  
123 (*i.e.* 0.249 [0.168 – 0.33]; Fig. 1E).

124 To further confirm that the QTL region on chromosome 18 specifically modulates visual  
125 mate preferences, we also assayed mate preference behaviors of *H. timareta* x *H. cydno* hybrid  
126 males towards white (transparently-painted) and red-painted *H. cydno* females (as described  
127 above). We found that backcross males heterozygous for *H. timareta* and *H. cydno* alleles at  
128 QTL confidence region on chromosome 18 court red-painted females more frequently than their  
129 brothers homozygous for the *H. cydno* allele ( $n = 270$ ,  $2\Delta\ln L = 7.811$ ,  $P = 0.005$ , Fig S1). While  
130 the effect size for this experiment (0.0778 [0.024 – 0.13]) is reduced compared to that seen for  
131 experiments using *H. timareta* females, this still represents a considerable proportion of the  
132 observed parental difference (~17%). Together our two experiments confirm that the same  
133 genomic region at the end of chromosome 18 modulates variation in visual mate preferences  
134 across the *melpomene-cydno* group.

135

### 136 **Genomic signatures of adaptive introgression at the preference locus**

137 To further determine whether introgression of preference alleles has contributed to behavioral  
138 evolution in these species, we next analyzed admixture proportions ( $f_d$ , (28)) between sympatric  
139 red-preferring *H. melpomene* and *H. timareta*. We observed two striking peaks of admixture in  
140 the QTL region on chromosome 18, located within the behavioral QTL peak (*i.e.* the region of  
141 greatest statistical association with difference in male preference between *H. cydno* and *H.*  
142 *melpomene*) and upstream of the adjacent major color pattern gene, *optix* (corresponding to its  
143 putative regulatory region) (Fig. 2, *c.f.* Fig. S2). Admixture estimates are repeatable across  
144 geographic populations of *H. melpomene* and *H. timareta*, and are independent of variation in  
145 local recombination rates (known to otherwise correlate with admixture proportions (29) (Fig. 2).

146 Introgression at the two loci on chromosome 18 is further supported by analyses using  
147 *Twisst* (30), which quantifies the proportion of different phylogenetic relationships among  
148 individuals of different species across the chromosome. In these analyses, the “introgression”  
149 topology, where *H. timareta* and *H. melpomene* cluster together, with *H. cydno* as an outgroup, is  
150 strongly supported both within the QTL peak and at *optix* (Figs. 2 and S3). These admixture

151 peaks additionally coincide with elevated levels of genetic differentiation ( $F_{ST}$ ) and absolute  
152 genetic divergence ( $d_{xy}$ ) between red- and white-preferring populations (Fig 2). Finally, using  
153 *Sweepfinder2* (31), we found evidence for a recent selective sweep in *H. timareta* (top 1%  
154 quantile across autosomes), coincident with the peak of increased admixture within the  
155 behavioral QTL peak described above, but not at *optix* (Figs. 2 and S4). These results suggest  
156 adaptive introgression of alleles from red-preferring *H. melpomene* into *H. timareta* at a genomic  
157 location strongly associated with variation in visual preference.

158  
159  
160

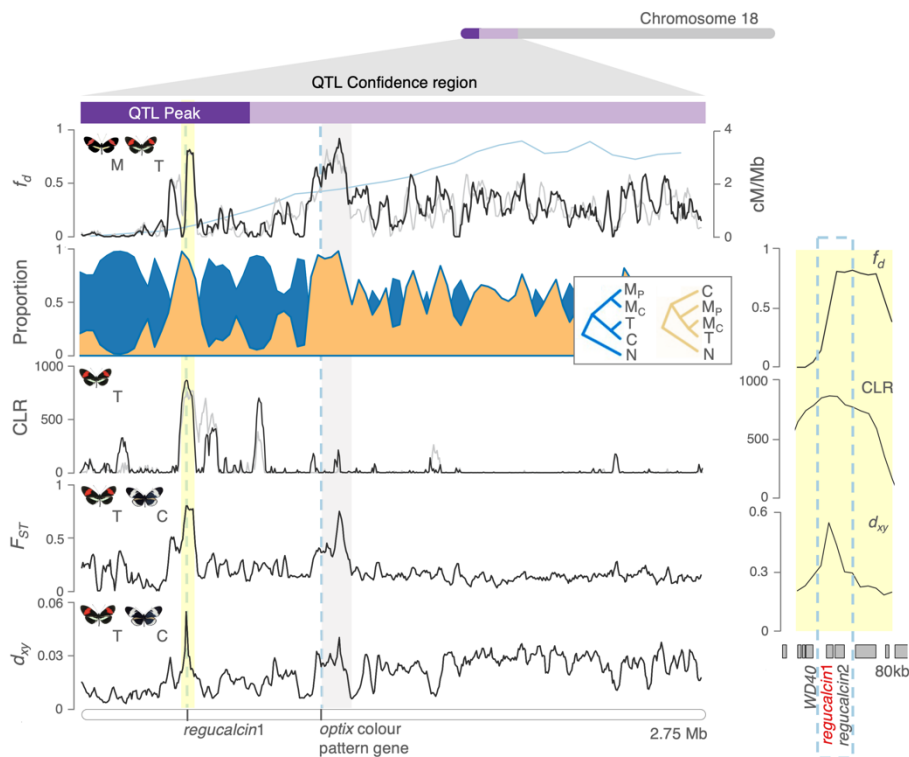

161  
162

163 **Figure 2. Different genomic signatures support both divergence and adaptive introgression at the**  
164 ***regucalcin* locus.** Left, from top to bottom: Admixture proportion values (20kb windows) between *H.*  
165 *melpomene* and *H. timareta* at the behavioral QTL region on chromosome 18 (x-axis indicates physical  
166 position) for Colombian (black) and Peruvian (gray) populations, with recombination rate overlaid in blue;  
167 topology weightings (proportions of a particular phylogenetic tree over all possible rooted trees) for the  
168 “species” (blue) and “introgression” (orange) trees (50 SNPs windows, a *loess* smoothing function across  
169 150kb windows was applied). *H. numata* was used as outgroup; composite likelihood ratio (CLR) of a  
170 selective sweep in *H. timareta* (50 SNPs windows); fixation index ( $F_{ST}$ ) and  $d_{xy}$ , measures of genetic

171 differentiation and divergence, between *H. timareta* and *H. cydno*. The gene coordinates of the candidate  
172 gene for behavioral difference *regucalcin1* as well as *optix* (~500 kb apart) and its putative regulatory  
173 regions, are highlighted by vertical gray dotted lines and shading. Panel to the right zooms into the region  
174 containing candidate behavioral genes. M, T, C and N denote *H. melpomene*, *H. timareta*, *H. cydno* and *H.*  
175 *numata*, respectively; subscripts <sub>P</sub> and <sub>C</sub> denote Panama and Colombia, respectively

176

### 177 **Cis-regulated expression differences of *regucalcin1* are associated with visual preference**

178 We next generated RNAseq libraries for combined eye and brain tissue from adult males across  
179 all populations tested in our preference assays to determine whether consistent differences in  
180 gene expression are associated with the behavioral QTL on chromosome 18. We sampled at the  
181 adult stage reasoning that if the neural mechanism underlying divergent behaviors involves a  
182 change in neuronal activity, this might require sustained transcription. Of 200 genes within the  
183 chromosome 18 QTL candidate region, only one was consistently differentially expressed across  
184 all red and white preferring population comparisons (reared under common garden conditions,  
185 Fig. S5). Specifically, *regucalcin1*, which perfectly coincides with the peak of adaptive  
186 introgression between red-preferring populations detected above, shows lower expression in the  
187 neural tissue of Panamanian and Colombian populations of *H. melpomene* and *H. timareta*, all of  
188 which we have shown to have a red preference as compared to *H. cydno* (Fig. 3A and S6).  
189 Expression of *regucalcin1* is also significantly reduced in *H. melpomene amaryllis* and *H.*  
190 *melpomene melpomene* as compared to *H. cydno*, two additional populations additionally known  
191 to display a preference for red females (17, 32) (Fig. S6). Immunostainings in adult male *H.*  
192 *melpomene* brains revealed expression patterns of *regucalcin1* across the brain, including in the  
193 visual pathways, predominantly in soma, and also in neuropil (Fig. 3C). Although this does not  
194 pinpoint the particular site of action in the brain, it confirms that regulatory changes of  
195 *regucalcin1* have the potential to affect visual preference behavior.

196 If expression differences in *regucalcin1* are responsible for the behavioral variation  
197 associated with the QTL on chromosome 18, they must result from changes within the *cis*-  
198 regulatory regions of the genes themselves, as opposed to those of other *trans*-acting genes  
199 elsewhere in the genome. To test whether differences in gene-expression levels between parental  
200 species were due to *cis*- or *trans*-regulatory changes, we conducted allele-specific expression  
201 analyses in adult male F1 *H. melpomene* x *H. cydno* and *H. cydno* x *H. timareta* hybrids. In F1  
202 hybrids, both parental alleles are exposed to the same *trans*-environment, and consequently  
203 *trans*-acting factors will act on alleles derived from each species equally (unless there is a change

204 in the *cis*-regulatory regions of the respective alleles). Confirming *cis*-regulation of *regucalcin1*,  
 205 we found a significant 2-fold up-regulation of the *H. cydno* allele relative to the *H. melpomene* or  
 206 *H. timareta* allele in the neural tissue of both our *H. melpomene* x *H. cydno* and *H. timareta* x *H.*  
 207 *cydno* F1 males (Wald test all comparisons:  $P < 0.001$ , Fig. 3B).  
 208  
 209

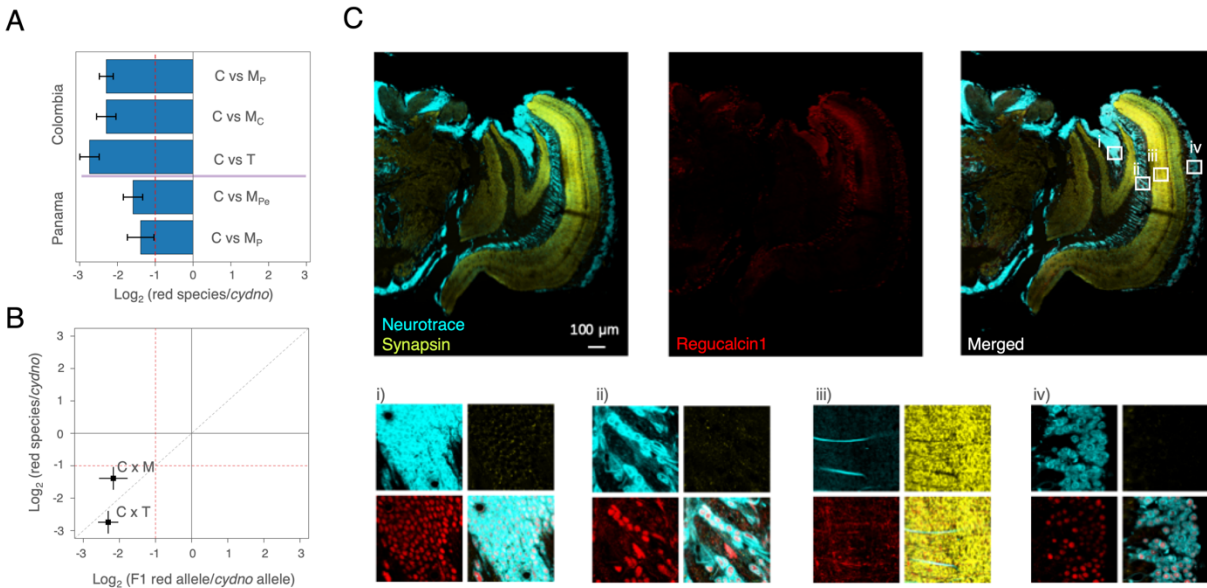

210  
 211 **Figure 3. *Cis*-regulated expression differences of *regucalcin1* are associated with visual preference**  
 212 **and *regucalcin1* is expressed in the visual pathways.** (A) *Regucalcin1* is differentially expressed between  
 213 red-preferring and white-preferring butterflies. Histogram heights represent the value and bars the standard  
 214 error of the (base 2) logarithmic fold change in expression between red-preferring and white-preferring  
 215 *Heliconius* subspecies (comparisons conducted only between butterflies raised in the same insectary  
 216 locations). The dashed red line indicates the threshold for a 2-fold change in expression. M, T, C denote *H.*  
 217 *melpomene*, *H. timareta* and *H. cydno*, respectively; subscripts <sub>p</sub>, <sub>c</sub> and <sub>p<sub>e</sub></sub> denote Panama, Colombia and  
 218 Peru, respectively. (B) Allele specific expression analyses indicate that differences in expression of  
 219 *regucalcin1* in the brains of red and white preferring population is *cis*-regulated. Points indicate the value  
 220 and bars the standard error of the log<sub>2</sub> (fold change) in expression between parental species (vertical) and  
 221 the alleles in F1 hybrids (horizontal), for *regucalcin1*. Dashed red lines indicate the threshold for a 2-fold  
 222 change in expression for the genes in the species (horizontal), and for the alleles in the hybrids (vertical).  
 223 *Regucalcin1* is largely *cis*-regulated (indicated by proximity to  $y=x$ ). (C) *Regucalcin1* is widely expressed  
 224 in *Heliconius melpomene* brains, including the visual pathway. On top, immunostaining of the right  
 225 hemisphere, from left to right: counterstaining of somata with *neurotrace* and of the neuropil with *synapsin*,  
 226 center: staining against *regucalcin1*, right: merged image. Below, enlargement of somata (i, iii, iv) and  
 227 neuropil (ii) along the visual pathway.  
 228



229 **CRISPR/Cas9 mediated knock-out of *regucalcin1* disrupts male courtship behaviors**

230 Combining genetic crosses and behavioral data, as well as population genomic and expression  
231 analyses, our results strongly implicate *regucalcin1* as a visual preference gene. To functionally  
232 test for a link between gene and behavior, we knocked-out the protein coding region of  
233 *regucalcin1* in *H. melpomene* individuals by introducing a deletion spanning most of its first and  
234 second exon using CRISPR/Cas9 (Fig. 4A). In trials with a single conspecific female (Fig. 4B),  
235 mosaic knock-out (mKO) males (*i.e.*, those with a deletion at *regucalcin1* in a substantial  
236 number of cells, including in brain tissue, Fig. S8) were significantly less likely court than  
237 control (ND) males without the deletion (difference in proportion minutes courting, trials with  
238 mKO males - trials with ND males = 0.24 [0.03-0.55];  $2\Delta\ln L = 4.51$ ,  $P < 0.05$ ; Fig. 4C). mKO  
239 knockout individuals may suffer decreased viability both pre- and post-eclosion (Fig. S7), and  
240 some mKO butterflies were unable to fly (8/44 individuals) as determined in our ‘drop test’, as  
241 compared to 0/40 ND individuals or 0/42 wildtype individuals; Fisher exact test:  $P < 0.001$ ).  
242 However, only surviving males that could fly were included in our courtship trials. Furthermore,  
243 all mKO (36/36), ND (31/31) and wildtype (30/30) individuals tested, including seven  
244 individuals that failed the subsequent drop test, showed an optomotor response, suggesting basic  
245 visual sensorimotor skills are largely intact in mKO individuals. Finally, we observed no  
246 difference in the proportion of time flying or feeding between the same mKO or ND males  
247 included in our courtship trials (0.01 [-0.07-0.097];  $2\Delta\ln L = 0$ ,  $P > 0.9$ ; Fig. 4C and S9). In other  
248 words, courtship – but not other behaviors – was significantly reduced in *regucalcin1* knockout  
249 males as compared to controls, which retain functional copies of *regucalcin1*. This provides  
250 functional evidence that *regucalcin1* has a specific effect on male courtship behavior, and that  
251 this is not due to a more general impairment of behavior.

252

253

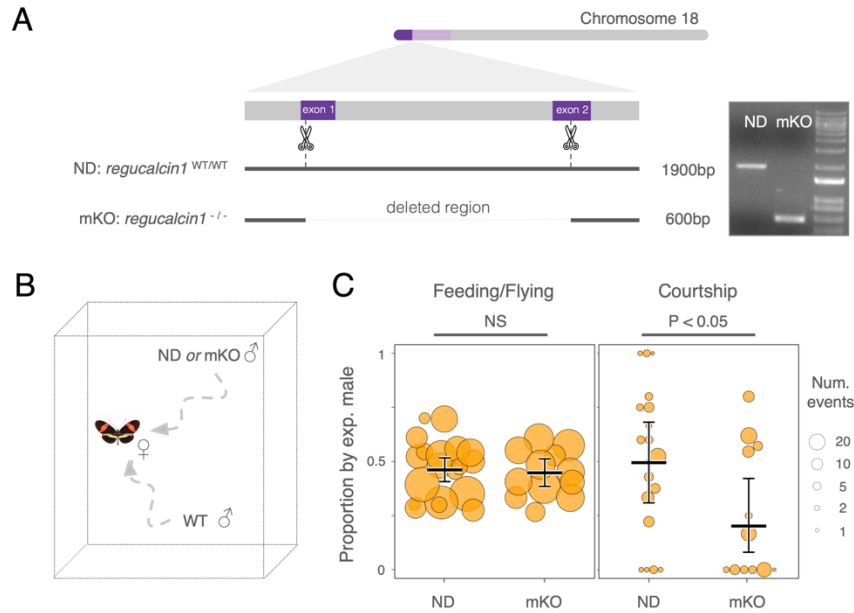

254

255 **Figure 4. Disruption of *regucalcin1* with CRISPR/Cas9 impairs male courtship behavior.** (A) Left:  
256 schematic representation of the *regucalcin1* locus with the target sites of the small guide RNAs and resulting  
257 CRISPR/Cas9-mediated deletion. Right: gel electrophoresis of PCR-amplified *regucalcin1* fragments from  
258 individuals without (ND) and with deletion (mKO) at *regucalcin1*. (B) Schematic representation of  
259 courtship trials. Experimental (*i.e.*, a mKO or ND) males that passed our ‘drop test’ were paired with a  
260 wildtype (WT) male and introduced into a cage with a wildtype virgin *H. melpomene* female. This paired  
261 design allowed us to control for both the injection procedure, as well as prevailing conditions that might  
262 potentially influence male behavior. (C) Proportion of time spent flying or feeding by injected but non-  
263 deletion (ND) males and *regucalcin1* mosaic knock-out (mKO) males relative to wildtype (WT) males (left  
264 panel); proportion of courtship time directed towards the same *H. melpomene* female by injected but non-  
265 deletion (ND) males (left) and *regucalcin1* mosaic knock-out (mKO) males relative to wildtype (WT) males  
266 (right panel). Point size is scaled to the number of total minutes a male flew/fed or courted during the  
267 experiments.

268

## 269 **Conclusions**

270 Hybridization has been suggested to be an important source of genetic variation on which  
271 selection can act, including during behavioral evolution (33, 34), but direct links between  
272 specific causal genes and behavioral phenotypes are lacking. Our results strongly suggest that  
273 *Heliconius timareta* acquired a *regucalcin1* allele by hybridizing with its closely related co-  
274 mimic *H. melpomene*, increasing attraction towards red females (and presumably reproductive  
275 success). In contrast, where *H. melpomene* co-occurs with the equally closely related but  
276 differently colored *H. cydno*, *regucalcin1* contributes an important barrier to interspecific gene  
277 flow through its contribution to divergent mating preferences (11, 35). As such, the evolutionary

278 impact of *regucalcin1* depends on the local mimetic landscape, emphasizing the complex role  
279 that hybridization may have on population divergence by reassembling genetic variants (36).

280 We also show that although variation in red color cue and preference map to the same  
281 genomic region, they are encoded by separate loci regulating the expression of *optix* (15, Fig.  
282 S10) and *regucalcin1*, respectively. By ensuring robust genetic associations between components  
283 of reproductive isolation, physical linkage is expected to facilitate speciation with gene flow, and  
284 this is likely the case for the differently colored species *H. cydno* and *H. melpomene* (11).  
285 However, our present results suggest these loci can also evolve independently, and evidence of a  
286 recent selective sweep in *H. timareta* at *regucalcin1*, but not *optix*, as well as distinct peaks of  
287 admixture between red-preferring species at these two genes, suggest separate introgression  
288 events. It seems likely that the acquisition of red patterns in *H. timareta* was immediately  
289 advantageous given strong selection for mimicry of local warning patterns, whereas the  
290 corresponding male preference would become advantageous only when conspecific red females  
291 had already increased in frequency.

292 Other prominent examples of visual preference evolution have emphasized the role of  
293 selection imposed by the broader sensory environment. In cichlid fish, for example, divergent  
294 mating preferences may have evolved as a by-product of environmental selection acting on  
295 visual pigment genes (15, 37). Interestingly, *H. timareta* and *H. melpomene* have evolved  
296 parallel visual preferences despite inhabiting divergent light environments (*H. timareta* is found  
297 in similar forest habitats to *H. cydno*), to which the neural and sensory systems are otherwise  
298 adapted (38). This suggests that visual preference evolution in *Heliconius* is not the by-product  
299 of divergent selection imposed by the broader sensory environment, but rather a consequence of  
300 direct selection to find receptive females, perhaps strengthened through reinforcement (where  
301 selection favors increased premating barriers to avoid the production of less fit hybrids)(17, 39,  
302 40).

303 Overall, our study suggests that the evolution of *cis*-regulated differences in *regucalcin1*  
304 expression contributes to divergent mating preferences in *Heliconius*, and that hybridization can  
305 be an important source of genetic variation during behavioral evolution. The function of  
306 *regucalcin* has not been well characterized though it seems to be involved in calcium  
307 homeostasis and signaling (41). Our CRISPR-mediated *regucalcin1* knock-out impaired survival  
308 and flight in a few mosaic butterflies, supporting a broad role across biological processes.

309 However, in other mosaic knock-out individuals we observed a significant reduction in mate  
310 attraction behaviors, independent of more general impairment of motor activity, implying  
311 specific effects on male mating behavior. *Regucalcin1* expression differences, sustained in adult  
312 brain tissue, likely alter how visual information is processed or integrated in the brain to  
313 determine divergent mating preferences. The challenge now is to determine the molecular and  
314 neural mechanisms through which it acts.

## 315 **Materials and Methods**

316 Butterfly stocks. Genetic crosses and preference trials were conducted at the Experimental  
317 Station José Celestino Mutis - Universidad del Rosario in La Vega (Colombia), between  
318 September 2019 and May 2022. Butterfly stocks for behavioral experiments were established  
319 from individuals caught around La Vega (*H. cydno cydno*; 5.0005° N, 74.3394° W) and Mocoa  
320 (*H. melpomene bellula* and *H. timareta tristero*; 1.1478° N, 76.6481° W) in Colombia, and were  
321 maintained under common garden conditions. Larvae were reared on *Passiflora* leaves until  
322 pupation and adult butterflies were provided with ~10% sugar solution daily and *Psiguria*  
323 flowers as a source of pollen.

324  
325 Male preference trials. We assayed preference behaviors for a total of 794 individual males  
326 across 3637 standardized choice trials (11). This included pure *H. melpomene bellula*, *H.*  
327 *timareta tristero*, *H. cydno cydno* males, as well as first generation (F1) *H. timareta tristero* x *H.*  
328 *cydno cydno* hybrids (obtained by crossing a *H. timareta tristero* male to a *H. cydno cydno*  
329 female) and backcross hybrids to *H. cydno cydno*. In brief, males were introduced into outdoor  
330 experimental cages (2x2x2m) with a virgin female of each type, either *H. cydno cydno* vs. *H.*  
331 *timareta tristero* females, or *H. cydno cydno* painted with a clear or red marker pen depending on  
332 the experiment (see below). 15-minutes trials were divided into 1-minute intervals, where  
333 courtship (sustained hovering or chasing) was scored as having occurred or not. If a male courted  
334 the same female twice during a minute interval, it was recorded only once; if courtship continued  
335 into a second minute, it was recorded twice. Whenever possible, trials were repeated 5 times for  
336 each male. From these trials we generated a data set that includes the total number of “courtship  
337 minutes” directed toward *red* and the number of “courtship minutes” toward *white* females.

338

339 Mimicking the *H. timareta* red forewing coloration. In addition to experiments with *H. cydno*  
340 *cydno* and *H. timareta tristero* females, we recorded male preference phenotypes in trials with  
341 two artificially colored virgin *H. cydno cydno* females. One female had the dorsal side of the  
342 white forewing band painted with a red marker pen (R05, Copic Ciao, Tokyo, Japan), and the  
343 other with a transparent pen (Ciao 0, Copic Ciao) as control. These markers incorporate the same  
344 solvent (Copic Ciao, pers. communication). Unlike *H. cydno cydno* whose forewing band is  
345 white, *H. timareta tristero* has a red forewing band and this difference is determined by  
346 expression differences of the gene *optix*, which determines the placement of orange or red  
347 ommochrome pigments on *Heliconius* wings (18). Other color pattern elements also distinguish  
348 these populations, including the white hindwing margin displayed by *H. c. cydno* and a yellow  
349 hindwing bar in *H. t. tristero*. Because it is harder to match these colors across species, and  
350 because we were specifically interested in attraction to red patterns (which are the predominant  
351 difference between *H. cydno* and *H. timareta/H. melpomene* warning patterns across different  
352 geographical populations), we only manipulated the forewing in our experiments.

353         The red marker pen was chosen from several candidates (R14, R17, R27, R29, R35, R46  
354 and RV29, Copic Ciao) to best mimic the forewing color of *H. timareta tristero* with regard to  
355 *Heliconius* color vision models. For this, we took photographs of red painted wings of *H. cydno*  
356 *cydno* and of *H. timareta tristero* with a Nikon Nikkor D7000 camera (Nikon, Melville NY,  
357 USA) with a visible light (380-750nm range allowed) and a UV (100–380 nm) filter in RAW  
358 format. A 40% gray standard was included in each photograph for color calibration. The visible  
359 light and UV images of each wing were combined to generate a multispectral image, using the  
360 “Image calibration and analysis toolbox” (42) in ImageJ (43). The reflectance spectra of the  
361 forewing bands were extracted from the images and converted to quantum catch models (42)  
362 based on photoreceptor sensitivities of *H. erato* (44) and relative abundance of cone receptors for  
363 species in the *melpomene/cydno* group (44) (*H. erato* was the only *Heliconius* species for which  
364 photoreceptor cell sensitivities had been reported at the time of this analysis). Note that  
365 *Heliconius* can discriminate in the red-range even though they have only one long-wavelength  
366 (LW) opsin with peak sensitivity at 560nm due to the presence of red-filtering pigments in some  
367 ommatidia (45), that shifts the peak absorbance of some cones to ~600nm (46). However, this  
368 was not modeled in a first instance because the relative abundance of this cone receptor remains  
369 unknown (but see below).

370 We initially calculated pairwise “just noticeable differences” (JND) using a  
371 tetrachromatic (*H. erato*) color vision model with noise-limited opponent color channels, after  
372 (47), between the forewing band of *H. timareta tristero* and the red-painted *H. c. cydno* band  
373 using a Weber fraction of 0.05. The marker R05 had the lowest pairwise JND (0.89) and was  
374 therefore the marker we used to manipulate the forewing colors in experimental *H. cydno*  
375 females. A JND value less than 1 is considered to be generally indistinguishable by visual  
376 systems (48). To further corroborate that *Heliconius* males perceive the artificial and natural red  
377 patterns similarly, we acquired reflectance spectra of the artificial (red and clear) and natural (red  
378 and white) pattern elements using an Ocean Optics FLAME-T-XR1-ES spectrometer, a UV/Vis  
379 bifurcated fiber and a PX-2 Pulsed Xenon Lamp. A spectralon white standard (Ocean Optics  
380 WS-1) was used to calibrate the spectrometer. Each color pattern (*i.e.*, the forewing bar) was  
381 measured at three different locations (using an average of three scans), and the mean of the three  
382 measurements was used for further analyses. The reflectance data was analyzed through a  
383 tetrachromatic color vision model incorporating more recently published *H. melpomene*  
384 photoreceptor cell sensitivities (49). This differs from the model above in that we removed one  
385 UV channel and added the chromatic channel (red-shifted;  $\lambda_{\max} = 590$ ) linked to the presence of  
386 red filtering pigments (49) (UV-Rhodopsin1 ( $\lambda_{\max} = 360$  nm), blue-Rhodopsin ( $\lambda_{\max} = 470$ nm),  
387 long wavelength-Rhodopsin without filtering pigments ( $\lambda_{\max} = 570$ nm)). Photoreceptor cell  
388 abundances are not available for this newly classified photoreceptor type so we were unable to  
389 calculate JND values. Nevertheless, the reflectance spectra of the artificial and natural patterns  
390 overlap in shape and in tetrahedral color space when viewed under standard daylight (illum =  
391 "D65") against green foliage (bkg = "green") and with von Kris color correction (vonkries =  
392 TRUE; Figs. S1A and S1B respectively).

393  
394 Genotyping of backcross hybrids. Genotypes at the QTL peak (*i.e.*, the region of strongest  
395 statistical association) for variation in preference behavior between *H. cydno* and *H. melpomene*  
396 on chromosome 18 (*11*) segregates with the presence of the red forewing band in our crosses due  
397 to tight linkage with the major color pattern gene *optix*. Because the presence of the red band is  
398 dominant over its absence, we were able to infer genotype at the *optix* locus by inspecting the  
399 forewing band color in backcross to *H. cydno* hybrids (25). Specifically, hybrid individuals with  
400 a red band are heterozygous for *H. timareta/H. cydno* alleles, and individuals lacking it are

401 homozygous for the *H. cydno* allele. This allows a conservative test of whether this genomic  
402 region at the end of chromosome 18 influences variation in male preference based on wing  
403 pattern phenotype alone (25). Nevertheless, to confirm the segregation of *optix* alleles with red-  
404 color pattern in hybrid crosses and assay more specifically the genotype of hybrids at tightly  
405 linked candidate genes in the QTL peak on chromosome 18, we performed PCR amplification of  
406 a *regucalcin1* segment (found within the QTL peak). Analysis of whole genome sequence data  
407 (see below) identified indels differentiating *H. timareta* and *H. cydno* in this region, so we  
408 designed primers to encompass these putative indels at the level of *regucalcin1* (Table S2A).  
409 Genomic DNA (gDNA) was extracted from thorax tissue of our cross (*H. cydno cydno* and *H.*  
410 *timareta tristero*) grandparents, (*H. cydno cydno* and F1) parents and backcross hybrid progeny,  
411 using a DNAeasy Blood & Tissue kit with RNase A treatment (Qiagen, Valencia, CA, USA).  
412 Samples had previously been stored in 20 % DMSO, 0.5 M EDTA (pH 8.0) solution. We found  
413 that *H. cydno* and *H. timareta* individuals consistently differed in size of the PCR-amplified  
414 fragment, allowing us to infer genotype in the hybrid progeny. Similarly, we found indels that  
415 differentiate the two species within the QTL peak on chromosome 1 allowing us to infer  
416 genotype at this chromosomal location as well (Table S2A).

417  
418 Behavioral data analysis. We fitted generalized linear mixed models (GLMM) with binomial  
419 error structure and logit link function implemented with the R package lme4 to test for the effect  
420 of species or genotype on male preference. Specifically, we modeled the response vector of the  
421 number of “courtship minutes” toward the ‘red’ female (i.e., the *H. timareta tristero* or a red  
422 painted *H. cydno cydno* female) versus “courtship minutes” toward the ‘white’ (i.e., the *H. cydno*  
423 *cydno* or transparent painted *H. cydno cydno* female) and included type (i.e., species or  
424 genotype) as fixed factors. Significance was then determined by comparing models with type  
425 included as a fixed factor to models in which it was removed using likelihood ratio tests. An  
426 individual level random factor was included in all models to account for overdispersion, e.g.(50).  
427 Estimated marginal means and their confidence interval were extracted with the R package  
428 *emmeans*.

429 For our analysis testing the effect of genotype at the end of chromosome 18 on preference  
430 towards *H. timareta tristero* vs. *H. cydno cydno* females, we used the full data set of all 157  
431 backcross males that courted *H. timareta* or *H. cydno* at least once during the trials. Genotype

432 was initially determined from forewing color, but we updated this for 3 males of 130 males  
433 successfully genotyped at *regucalcin1* (found within the QTL peak), where we detected  
434 recombination between *regucalcin1* and *optix* (i.e., *optix cydno-cydno* – white forewing, QTL  
435 peak/*regucalcin1 timareta-cydno*). We note that any recombination between these loci in the  
436 individuals that we were unable to successfully genotype at *regucalcin1* will be rare (we expect  
437 just 0.62 recombination events between these two loci across the remaining 27 individuals that  
438 we could not genotype).

439         Although we were primarily interested in the effect of the QTL on chromosome 18,  
440 which has explicitly been shown to influence differences in visual preference between *H. cydno*  
441 and *H. melpomene* (25), two additional QTL have been implicated in variation in male mating  
442 preference between *H. cydno* and *H. melpomene* (11). The associated 1.5 lod confidence region  
443 of one of these incorporates the whole of chromosome 17, and in general is less well supported  
444 (11, 26). However, another behavioral QTL can be localized to a specific region of chromosome  
445 1, for which we were able to generate genotypes (see above). To additionally include this in our  
446 analysis, we repeated our analysis of the backcross hybrids, but this time using a reduced data set  
447 including only individuals that we were able to genotype successfully at previously identified  
448 QTL on chromosome 1 and 18 (see above for details). This time the model included two fixed  
449 factors (genotype at the chromosome 18 QTL, and genotype at the chromosome 1 QTL);  
450 significance was determined by dropping each in turn and once again assessed with likelihood  
451 ratio tests. There were no quantitative differences from our previous analysis for the QTL on  
452 chromosome 18. In contrast, there was only very limited support that the QTL on chromosome 1  
453 influences preference differences between *H. timareta* and *H. cydno* ( $n=128$ ,  $2\Delta\ln L = 3.79$ ,  $P =$   
454  $0.0515$ ), and as such we did not include this QTL in subsequent analysis. Finally, in our analysis  
455 considering preference by backcross hybrids towards red and transparent colored *H. cydno*  
456 females, we again used forewing color to determine genotype at the end of chromosome 18.

457  
458 gDNA extraction and whole-genome resequencing. gDNA was extracted from thorax tissue of 4  
459 *H. melpomene bellula* and 11 *H. t timareta tristero* individuals as well as the parents of F1  
460 hybrids (2 *H. t timareta tristero*, 2 *H. cydno cydno*, 2 *H. melpomene rosina*, 2 *H. cydno chioneus*,  
461 see below), that were previously stored in 20 % DMSO, 0.5 M EDTA (pH 8.0) solution, using a  
462 DNAeasy Blood & Tissue kit, with RNAase treatment (Qiagen). Illumina whole-genome



463 resequencing libraries were prepared and sequenced at Novogene (Hong Kong, China) in 125bp  
464 or 150bp paired-end mode (two different batches for *H. timareta tristero* individuals,  
465 respectively 9 and 2 samples). Previously compiled and published whole-genome resequencing  
466 data were retrieved for 5 *Heliconius numata*, 4 *H. melpomene bellula*, 10 *H. cydno chioneus*, 10  
467 *H. cydno zelinde*, 10 *H. melpomene. rosina*, 10 *H. melpomene amaryllis* and 10 *H. timareta*  
468 *thelxinoe* (19, 29, 51, 52). Whole-genome resequencing reads were mapped to the *H. melpomene*  
469 genome version 2 (53) with BWA mem v.0.7.15 (54). Duplicate reads were marked with Picard  
470 (<https://broadinstitute.github.io/picard/>) and variant calling was performed with GATK v3.7  
471 HaplotypeCaller (55) with default parameters except heterozygosity set to 0.02 (parameters as in  
472 (29), for comparable analyses). Individual genomic records were combined and jointly  
473 genotyped (GATK's GenotypeGVCFs) for each subspecies.

474  
475 Admixture proportions,  $F_{ST}$  and  $d_{xy}$  calculation. We calculated  $f_d$  (15), an estimate of admixture  
476 proportion based on the ABBA-BABA test, between *H. melpomene* and *H. timareta* populations  
477 as in (29) and implementing scripts available at <https://github.com/simonhmartin/>. For this,  
478 variant sites had to be biallelic SNPs (no indels), with Quality (Q) >30 and read depth (DP) >8.  
479 In addition, variant sites were filtered out if > 30% of individuals had missing genotype calls and  
480 if > 75% of individuals had heterozygous calls. The following populations were used to estimate  
481 admixture proportions: *H. cydno chioneus* and *H. cydno zelinde* as a (combined) allopatric  
482 control population, *H. timareta tristero* and *H. melpomene bellula* (or, in a separate analysis, *H.*  
483 *timareta thelxinoe* and *H. m. amaryllis*) as the two sympatric species, and *H. numata bicoloratus*  
484 as the outgroup.  $f_d$  was calculated in 20kb sliding windows (step = 5kb). For  $f_d$  estimates, only  
485 sites where >60% of individuals had a genotype were considered and  $f_d$  values had to be based  
486 on  $\geq 300$  ABBA-BABA informative sites per window. We also calculated sequence divergence  
487 ( $d_{xy}$ ) (56) and the fixation index ( $F_{ST}$ ) (57) in sliding 20kb windows (step = 5kb, 2000 genotyped  
488 sites required per window) with the script 'popgenWindows.py' available at  
489 <https://github.com/simonhmartin/>.

490  
491 Topology weighting. To quantify phylogenetic relationships between species in genomic  
492 intervals along the QTL region associated with visual preferences, we used *Twisst* (30). We used  
493 the same invariant/variant sites filtered as above (for  $f_d$  estimation), with the further requirement

494 that at each site no more than 25% of individuals were permitted missing genotypes. Genotypes  
495 were phased and imputed using Beagle (58). Neighbor-joining trees (59) were inferred using  
496 PhyML (60) (substitution model = GTR), as implemented in *Twisst*. Weightings for 15 possible  
497 topologies (rooted with *H. numata* as the outgroup) were estimated for non-overlapping 50 SNPs  
498 windows.

499  
500 Selective sweeps. Variant sites were filtered for genotype quality (GQ) > 30 and read depth  
501 (DP)>10, and required to be biallelic SNPs (no indels). Furthermore, variant sites had to be  
502 called in 8 individuals out of 10 for the focal population, and in 3 individuals out of 5 for the  
503 outgroup. Sites were polarized (ancestral vs. derived) using *H. numata* as an outgroup. The  
504 background site-frequency-spectrum (SFS) was computed across the whole-genome with the  
505 exception of the Z chromosome. We used SweepFinder2 (31), which has been previously used to  
506 detect introgressed sweeps at color pattern loci in *Heliconius* (61), to estimate the composite  
507 likelihood ratio (CLR) of a sweep model compared to a neutral model (neutrality is represented  
508 by the background SFS of the genome) in 50bp steps, using both polymorphic sites and  
509 substitutions (62). We considered those regions with top 1% quantile CLR values as having  
510 undergone a putative selective sweep.

511  
512 Brain tissue collection, RNA extraction and sequencing. Brain (optic lobes and central brain) and  
513 eye (ommatidia) tissue were dissected out of the head capsule (as a single combined tissue) of  
514 sexually naive, 10-days old males, in cold (4 °C) 0.01M PBS. We sampled a total of 5 *H.*  
515 *melpomene bellula*, 5 *H. melpomene melpomene*, 5 *H. timareta tristero*, 4 *H. cydno cydno*, and 4  
516 F1 hybrids *H. cydno cydno* x *H. timareta tristero*, which were stored in RNAlater (Thermo  
517 Fisher, Waltham, MA, USA) at 4 °C for 24 hours, and subsequently at -20 °C until RNA  
518 extraction. Previously compiled RNA-seq data for 5 *H. melpomene rosina*, 5 *H. cydno chioneus*,  
519 6 F1 hybrids *H. melpomene rosina* x *H. cydno chioneus* (generated with the same methods/in the  
520 same sequencing batch) were retrieved from (26). A further 5 *H. m. amaryllis* males were  
521 sampled from outbred stocks maintained at the Smithsonian insectaries in Gamboa, Panama.  
522 RNA was extracted and purified using TRIzol Reagent (Thermo Fisher) and a PureLink RNA  
523 Mini Kit with PureLink DNase digestion on column (Thermo Fisher). Illumina 150bp paired-end  
524 RNA-seq libraries were prepared and sequenced (in a single batch) at Novogene.

525  
526 Differential gene expression and exon usage. After trimming adaptor and low-quality bases from  
527 raw reads using TrimGalore v.0.4.4 ([www.bioinformatics.babraham.ac.uk/projects](http://www.bioinformatics.babraham.ac.uk/projects)), RNA-seq  
528 reads were mapped to the *H. melpomene* v. 2 genome (53)/ *H. melpomene* v. 2.5 annotation (63)  
529 using STAR v.2.4.2a in 2-pass mode (64) with default parameters (at first, see below). Only  
530 reads that mapped in ‘proper pairs’ were kept for further analysis using Samtools (65). For gene  
531 expression analyses, the number of reads mapping to each annotated gene was estimated with  
532 HTseq v. 0.9.1 (model = union) (66). For exon usage analyses, the number of reads mapping to  
533 each annotated exon was estimated using the python script “dexseq\_counts.py” from the  
534 DEXSeq package (66). Differential gene expression analyses were conducted with DESeq2 (67),  
535 differential exon usage analyses with DEXSeq (66). Pairwise transcriptomic comparisons were  
536 conducted only between species raised in the same insectary locations (either Panama or  
537 Colombia) to avoid the confounding effect of environmentally-induced gene expression changes  
538 (Fig. S5). We considered only those genes showing a 2-fold change in expression level at  
539 adjusted (false discovery rate 5%) p-values < 0.05 (Wald test) to be differentially expressed.

540 An initial finding that all red-preferring subspecies showed a significantly higher  
541 expression of the last exon (5) of *regucalcin1* (HMEL013551g4) compared to white preferring  
542 species, prompted us to study whether the highly divergent sequence of red-preferring (including  
543 the *H. melpomene* reference genome) vs. white-preferring subspecies in this region might have  
544 affected this. In fact, when using more permissive parameters than the default parameters in  
545 STAR v.2.4.2a (see below), differential usage of exon 5 of *regucalcin1* disappeared in many  
546 comparisons. Given that i) with these permissive parameters there is uniform RNA-seq reads  
547 coverage of exon 5 in *H. cydno* subspecies ii) when using even more permissive parameters  
548 (parameters set 2, see below) the results remain unchanged, and that iii) when using PacBio  
549 RNA long-read data from *H. cydno* to assemble the *regucalcin1* transcript, exon 5 is included  
550 (see below), we concluded that the more permissive parameters are more appropriate, and that,  
551 the initial finding of consistent differential exon 5 usage is likely an artifact of too stringent  
552 (default) mapping parameters. We find no consistent significant changes in exon usage across all  
553 comparisons with these new parameters.

554

555 RNA-seq mapping parameters. The default mapping parameters in STAR v.2.4.2a (64) were  
556 changed to more permissive ones (parameters set 1):  
557 --outFilterMismatchNmax 15 --outFilterMismatchNoverReadLmax 0.1 --  
558 outFilterMismatchNoverLmax 0.1 --outFilterScoreMinOverLread 0.5 --  
559 outFilterMatchNminOverLread 0.5.

560

561 We also conducted the same analyses with yet more permissive parameters (parameters set 2):

562 --outFilterMismatchNmax 20 --outFilterMismatchNoverReadLmax 2 --  
563 outFilterMismatchNoverLmax 0.2 --outFilterScoreMinOverLread 0.33 --  
564 outFilterMatchNminOverLread 0.33.

565 PacBio isoform sequencing. Brain (optic lobes and central brain) and eye (ommatidia) tissue  
566 were dissected out of the head capsule (as a single combined tissue) of sexually naive, 10-days  
567 old males, in cold (4 °C) 0.01M PBS. Tissues were stored in RNAlater (Thermo Fisher,  
568 Waltham, MA, USA) at 4 °C for 24 hours, and subsequently at -20 °C (Colombian samples) or -  
569 80 °C (Panamanian samples) until RNA extraction. RNA was extracted and purified using  
570 TRIzol Reagent and a PureLink RNA Mini Kit with PureLink DNase digestion on column from  
571 a pull of whole-brain and eye tissue of the same subspecies (4 *H. melpomene rosina*, 4 *H.*  
572 *timareta tristero* and 2 *H. cydno chioneus* male individuals) for a total of 3 libraries, one for each  
573 subspecies. Single molecule real-time (SMRTbell) libraries were prepared and sequenced at  
574 Novogene (Hong Kong, China), on a PacBio RSII platform (Pacific Biosciences, Menlo Park,  
575 CA, USA).

576 Isoform assembly/discovery and transcript-guided annotation. Following the custom IsoSeq v3  
577 pipeline (<https://github.com/PacificBiosciences/IsoSeq/>), Iso-Seq subreads from each library  
578 were used to generate circular consensus sequences (ccs), and polyA tails and artificial  
579 concatemers were removed (primers = 5' AAGCAGTGGTATCAACGCAGAGTACATGGG, 3'  
580 GTACTCTGCGTTGATACCACTGCTT). Bam files were transformed into fastq format using  
581 Samtools (65). Reads were mapped to the *H. melpomene* 2 (53) genome using *minimap2* (68)  
582 with default parameters for PacBio Iso-Seq (-ax splice:hq). Stringtie2 (69) was used to assemble  
583 de-novo transcripts, in order to conduct between-species comparison of isoform expression.

584 However, coverage of Iso-Seq reads was low and the resulting transcriptome annotation  
585 sparse/incomplete not permitting inference of differential isoform expression between species.

586 Allele-specific expression (ASE) analyses. 8 parental individuals of the F1 hybrids *H.*  
587 *melpomene rosina* x *H. cydno chioneus* and F1 hybrids *H. cydno cydno* x *H. timareta tristero*  
588 (two broods for each F1 hybrid type), were genotyped using GATK v3.7 HaplotypeCaller.  
589 Individual genomic records were filtered with “hard-filters” following the GATK’s Best  
590 Practices. From these filtered variants, we extracted variant sites with opposite alleles between  
591 each parental pair with *bcftools intersect*. At the same time, we marked duplicate F1 hybrid  
592 RNA-seq reads with Picard v.1.8 (<https://broadinstitute.github.io/picard/>), applied the GATK’s  
593 SplitNCigarReads function and genotyped RNA-reads with HaplotypeCaller. We filtered out  
594 variant sites from F1 hybrid RNA-seq reads that had quality by depth (QD) < 2 and strand bias  
595 (FS) >30, and kept only biallelic heterozygous SNPs for further analysis (allele-informative sites  
596 should be heterozygous for the parental alleles).

597 Finally, we used GATK’s ASEReadCounter (without deduplicating RNA reads) to count  
598 how many RNA-reads mapped to either parental allele. We tested for differential allele specific  
599 expression for each gene with the model “~0 + individual + allele” in DESeq2 (setting  
600 sizeFactors = 1, *i.e.*, without library size normalization between samples). By testing for ASE in  
601 F1 hybrids we can also confirm that known volumetric differences between *H. melpomene* and  
602 *H. cydno/H. timareta* (38) do not account for differences in *regucalcin1* gene expression.

603

604 Immunocytochemistry. An affinity-purified polyclonal rabbit antibody against *regucalcin1* was  
605 developed with a *ThermoFisher* 70-days immunization protocol. Criterion to avoid cross-  
606 interaction with other epitopes was that less than 4 amino acids matched with another predicted  
607 protein from the *H. melpomene* genome assembly/annotation (Hmel2.5) (53, 63). The antigen  
608 target region is "EPGKFHLKKGALYRIDED". Antibodies were stored at -20°C in 50%  
609 glycerol.

610 Heads of insectary-reared *H. melpomene rosina* male individuals of 2-8 days of age were  
611 fixed in paraformaldehyde (PFA) 4% for 24 hours. Brains were dissected out of the head capsule  
612 in 0.02M PBS, removing the ommatidial, retinal and laminal tissue, and then embedded in 4%  
613 agar and sliced at 250nm with a LeicaVT1200S vibratome. As such, because our samples did not  
614 include ommatidial and laminal tissue, we cannot rule out expression in these more peripheral

615 stages of visual processing. Brain sections were washed with blocking solution (BS: 1,5% Triton  
616 X-100 ; 0,1% Saponin; 1% bovine serum albumin) 3 times for 30 minutes at room temperature  
617 and then incubated at 4°C for 2 days with 1:100 rabbit *regucalcin1* primary antibody (we  
618 combined an equal amount of two immunized rabbits sera, with 1.24 and 2.5 mg/ml  
619 concentration respectively before glycerol dilution) and 1:30 mouse *synapsin* (anti SYNORF1,  
620 Developmental Studies Hybridoma Bank, University of Iowa, Iowa City, IA,RRID: AB\_528479)  
621 in BS solution. Samples were washed 3x30min in BS at room temperature, and then incubated  
622 for 1 day at 4°C with Alexa 647 anti-rabbit (Dianova, 711-606-152, 1:300), Cy3 anti-mouse  
623 (Dianova 715-166-151, 1:400), and Neuro Trace blue (Mol probes invitrogen, 1:300) in BS.  
624 Finally, samples were washed 3x30min in PBS, and then mounted in Vectashield medium.  
625 Although this data does not pinpoint the site of action, they confirm that regulatory changes of  
626 *regucalcin1* could influence preference by affecting processing at multiple sites along the visual  
627 pathways.

628  
629 Confocal imaging and image analysis. Brains were imaged with a Stellaris 5 confocal  
630 microscope (Leica) equipped with a white light laser and a 405nm laser, and a HC PL APO CS2  
631 40x /1.10 water immersion objective and with the tile scanning function. Excitation wavelengths  
632 and emission filters were 405 nm and 476-549 nm for neurotrace blue, 554 nm and 559-658 nm  
633 for Cy3, and 653nm and 658-750 nm for Alexa 647. Images were acquired with a pixel size of  
634 0.142 µm and a pinhole aperture of 1 Airy unit. Confocal images were analyzed on ImageJ  
635 (<https://imagej.nih.gov/ij/>). A median filter was applied and signal intensity adjusted on whole  
636 images for each wavelength.

637  
638 CRISPR/Cas9-mediated mutagenesis of *regucalcin1*. *Heliconius melpomene rosina* pupae were  
639 obtained from a commercial supplier (<https://www.butterflyfarm.co.cr>) and used to establish a  
640 stock in an external greenhouse at LMU Munich. We used *GeneiousPrime* v2021.1 to design 4  
641 guide RNAs corresponding to N<sub>20</sub>NGG (on either strand), targeting exon1 and exon2 of  
642 *regucalcin1* (Table S2B), considering the gRNA efficiency scores predicted from (70), favoring  
643 GC-rich regions close to the PAM (NGG) sequence, and avoiding polymorphic sites in our  
644 butterfly stock. N<sub>20</sub>NGG sequences were screened for off-targets in the *H. melpomene* 2.5

645 genome with the BLAST function of Lepbase v4. Only guide RNAs that had unique seed regions  
646 12bp upstream of the PAM were considered further to avoid off-targets.

647 Synthetic sgRNAs were ordered from *Synthego* (Redwood City, CA, US) and  
648 resuspended in TE (0.1mM EDTA, pH 8.0) buffer (Sigma Aldrich, St. Louis, MO, US). Cas9  
649 protein (CP01, PNAbio) was reconstituted in nuclease-free water and 5% Phenol Red Solution  
650 (Sigma Aldrich), following the guidelines in (71). A mix of 4 gRNAs and later 2gRNAs and  
651 Cas9 protein (250:500ng/ $\mu$ l) was injected in eggs between 1 and 4.3 hours after laying, using a  
652 Femto Jet (Eppendorf, Hamburg, Germany).

653 To genotype mosaic generation zero (G0) individuals, we extracted gDNA from two  
654 caterpillar spikes at 4<sup>th</sup>/5<sup>th</sup> instar by squishing the spikes with a filter tip in 9  $\mu$ l NaOH solution  
655 (50mM), incubating at 95°C for 15 minutes, cooling the reaction on ice for 2 minutes and adding  
656 1  $\mu$ l of Tris-HCl (1M) (Nicolas Gompel and Luca Livraghi pers. comm., modified from (72)).  
657 We then PCR-amplified a region of *regucalcin1* (Table S2), to screen for CRISPR/Cas9  
658 mediated deletions as a result of non-homologous end-joining following multiple double-strand  
659 breaks predicted to result in a ~600bp DNA fragment (with deletion) instead of ~1900bp (no  
660 deletion).

661 We purified DNA from gel bands of the allele carrying the predicted deletion with a  
662 MinElute Gel Extraction Kit (QIAGEN) and ExoSap (Thermo Fisher) and Sanger-sequenced  
663 with a BigDye v1.1 kit (Thermo Fisher) with the Genomics Service Unit of LMU Munich to find  
664 that the same 2 gRNAs (Table S2) consistently mediated the introduction of a deletion and were  
665 therefore used for generating *regucalcin1* mKO butterflies in all experiments (survival/efficiency  
666 statistics for CRISPR experiments in Table S1). Although most CRISPR-mediated deletions  
667 were of the expected size (1300bp deletion), in a few mKO individuals the deletion varied in size  
668 (ranging from ~400bp to ~1500bp), probably due to variation in the DNA repair process.  
669 Nevertheless, we found that the boundaries of these deletions always coincided with either one  
670 of the two sgRNA target sites, likely generating similarly non-functional alleles. Individuals that  
671 were screened as mKO at the 4th/5th instar were subsequently confirmed as mKO by PCR on  
672 DNA extracted from adult brain, thorax or abdomen tissue with a DNAeasy Blood & Tissue kit.

673 We extracted gDNA from at least two tissues among brain, thorax and abdomen from 40  
674 individuals without deletion (ND), and sequenced their *regucalcin1* protein-coding region to  
675 screen for small frame-shift mutations/deletions following double-strand breaks at only one of

676 the CRISPR target sites, which would not be detected by our PCR-fragment size screen. We  
677 found that only 1/40 individuals (2.5%) showed evidence of a CRISPR-mediated mutation at  
678 only one of the target sites not resulting in a large deletion. Thus, ND mKO individuals with  
679 small frame-shift mutations are rare and might have only marginally impacted the results (i.e.,  
680 considered as ND instead of mKO). On the other hand, mKO individuals had a substantial  
681 percentage of cells carrying the deletion in their brain tissue (Fig. S8).

682

683 Drop test. To assay basic locomotor (flying) function of *regucalcin1* mKO butterflies, we  
684 conducted a ‘drop test’ with mKO, ND or WT butterflies one day post-eclosion during the  
685 butterfly’s active hours (between 10:20 and 17:30). Each butterfly was held by the forewings 1.5  
686 m above the ground at the center of a 2x2x2m cage and then released. This procedure was  
687 repeated 5 times for each butterfly, and individuals were considered to have ‘failed’ the test if  
688 they dropped directly on the ground (instead of flying) for all 5 trials (examples negative and  
689 positive responses, Video S1-S2). With the exception of three individuals (one mKO, one ND  
690 and one WT), all butterflies either dropped to the ground on all 5 trials, or flew on all five trials.

691

692 Optomotor assay. To determine whether *regucalcin1* mKO butterflies show a visual (optomotor)  
693 response, *i.e.*, an innate orienting response evoked by wide-field visual motion, we placed mKO,  
694 ND or WT butterflies >4 hours post-eclosion at the center of an experimental arena of 16 cm  
695 radius surrounded by a visual stimulus of alternating black and white stripes (73, 74). We used a  
696 visual stimulus with spatial frequency value (cycles-per-degree) of 0.2 cycles-per-degree (cpd).  
697 The width (in millimeters) of one cycle (a set of alternating black and white stripes) was  
698 calculated as  $cycle\ width = [(C/360) / a]$ , where ‘C’ is the circumference of the experimental  
699 arena (mm) and ‘a’ is the visual acuity (cpd). Butterflies were restrained in a clear  
700 PLEXIGLAS® cylinder and all assays were conducted at room temperature under illumination  
701 from an overhead LED lamp, and recorded with a GoPro camera (GoPro, San Mateo, CA, US)  
702 placed above the device. Butterflies were tested once they stopped crawling on the cylinder,  
703 which was followed by 6 rotations of the stimulus (alternating between clockwise and  
704 counterclockwise), each lasting 10 seconds, and running at a speed of three rotations per minute  
705 (3 rpm). A positive response was scored if the butterfly changed the orientation of its  
706 head/antenna in the direction of the moving stimulus and then re-oriented itself in the opposite



707 direction when the direction of rotation was reversed, across the whole 1-minute trial (see Video  
708 S3 for an example).

709

710 Courtship assay. mKO, ND and WT *H. melpomene* males were maintained together in a 2x2x2m  
711 cage in a greenhouse in Munich. As in our experiments in the tropics, butterflies were provided  
712 with *Lantana* and *Psiguria* flowers, as well as a sugar water supplement daily. All courtship  
713 trials were conducted between 11:00 and 1700. We paired either an experimental mKO or ND  
714 >5days post explosion male with a WT male (matched for age, but otherwise chosen at random).  
715 This paired design allowed us to control for both the injection procedure, as well as prevailing  
716 conditions that might potentially influence male behavior. Individuals that failed the drop test  
717 were excluded from courtship assays (as none survived five days post-eclosion). A WT virgin *H.*  
718 *melpomene* female (1-5 days post eclosion) was then introduced into the cage. As for our  
719 behavioral experiments in Colombia, 15-minute trials were divided into 1-minute intervals, and  
720 during each minute both the experimental and WT male were scored for three behaviors flying,  
721 feeding, and courting (sustained hovering over or chasing the female for >3 seconds). The  
722 experimental cage was shaken every 5 minutes to stimulate butterfly activity. In the minute-  
723 interval following cage shaking, a flying occurrence was recorded only if it lasted for 10  
724 uninterrupted seconds, or occurred after a butterfly had momentarily landed/stopped flying. The  
725 trials were stopped immediately if mating occurred (and the butterflies were gently separated).  
726 Trials were repeated up to 5 times for each experimental male (median=3). To further avoid  
727 biasing our results, we excluded from trials a single mKO male that did not fly, court or feed  
728 during all 4 trials in which it was tested (though this more conservative approach does not  
729 qualitatively affect our results).

730 As with data from our behavioral trials in Colombia, we tested for differences in relative  
731 courtship activity between mKO and ND males using generalized linear mixed models  
732 (GLMMs) with binomial error structure and logit link function (implemented with the R package  
733 lme4). This time the proportion of minutes courting females by experimental (i.e. mKO or ND)  
734 vs WT males was the dependent variable and the experimental male type (mKO or ND) was set  
735 as a fixed explanatory factor. We tested significance by comparing this model to a null model,  
736 excluding experimental type as an explanatory variable, with a likelihood ratio test. Once again,  
737 experimental male ID was included as an individual level random factor in all models to account

738 for overdispersion. To determine whether mKO and ND males differ in more general motor  
739 activities, we repeated these analyses, but this time with the proportion of minutes spent flying or  
740 feeding by experimental versus WT males. Estimated marginal means and confidence intervals  
741 were extracted using *emmeans*.

742

743 Patternize analysis. To determine whether *regucalcin1* mKO affects wing color patterns in *H.*  
744 *melpomene rosina*, we quantified and compared color patterns of mKO and ND butterflies using  
745 *patternize* (75). Wing pictures were taken in RAW format with a Fujifilm X-T3 camera with a  
746 Fujifilm 35mm F1.4 R lens, using a white-diffusion sheet (Lee filters 252) to homogenize  
747 lighting from two overhead LED lamps. The white balance of each image was then adjusted with  
748 the *Curves* feature (constant settings) in Adobe Photoshop CC 2019 (Adobe, CA, USA), to mask  
749 either one of the butterfly forewings (marked with a marker pen to keep track of individual  
750 butterflies ID) and to remove the background. To align wing images, we positioned 18 and 16  
751 landmarks respectively (as suggested in the *patternize* package) at vein intersections on the  
752 forewings and hindwings for each sample (Fig. S10A). A *thin plate spline* transformation was  
753 then used to align landmarks to a common (arbitrarily chosen) reference sample for each of 4  
754 groups (mKO males, mKO females, ND males, ND females) and each 4 patterns (forewing  
755 dorsal, forewing ventral, hindwing dorsal, hindwing ventral) independently. To compare pattern  
756 size and shape among samples, the red, green, and blue (RGB) values were extracted for each  
757 pattern of each group separately using *patternize*, with color threshold “colOffset”, and the  
758 relative size of the pattern was calculated as the proportion of the pattern area over the total wing  
759 area (of the same wing) using the *patArea* function in *patternize*. Differences in color pattern  
760 among groups were calculated by subtracting the pattern frequencies with the “sumRaster”  
761 function in *patternize*. The resulting rasters were analyzed using Gower’s dissimilarity measure  
762 (76) in the R package *StatMatch*, as commonly used for *patternize* data (for example in reef  
763 fishes, (77)), to determine statistically significant differences in pattern spatial distribution  
764 among groups (Fig. S10).

765

766 Data and analysis scripts.

767 All raw data and analysis scripts are available at:

768 [https://github.com/SpeciationBehaviour/Adaptive\\_introgression\\_of\\_a\\_visual\\_preference\\_gene](https://github.com/SpeciationBehaviour/Adaptive_introgression_of_a_visual_preference_gene) .

769 Genome re-sequencing and RNA-seq data will be published in the European Nucleotide Archive  
770 (ENA) upon acceptance for publication.

771

772

773 **Acknowledgements.** We dedicate this paper to the memory of our friend and colleague  
774 Alexander Hausmann. We are grateful to Bianca Hoelldobler, Isabel Leon, Francesco Rossi,  
775 Rebecca Stephens, Sophie Smith, José Borrero, Marilia Freire, Alberto Comin, Christina  
776 Burrows, Michaela Bauer and Christine Rottenberger for technical and rearing assistance, and  
777 Mathieu Choteau for help with fieldwork. We thank Francesco Cicconardi for sharing a pipeline  
778 for Iso-Seq analysis and Simon Martin for sharing vcf files. We thank Steven van Belleghem,  
779 Philipp Brand, Max Farnworth, Nicolas Gompel, Joseph Hanly, Luca Livraghi, Stephen  
780 Montgomery, Ricardo Pereira, Jochen Wolf and Vera Warmuth for valuable input on methods  
781 and the manuscript. We are grateful to *Autoridad Nacional de Licencias Ambientales*, Colombia  
782 for permission to collect butterflies. **Funding.** This work was funded by a Deutsche  
783 Forschungsgemeinschaft (DFG) Emmy Noether grant (Grant number: GZ:ME 4845/1-1) and  
784 ERC Starting grant (Grant number: 851040) awarded to RMM. Universidad del Rosario  
785 provided funding towards butterfly maintenance and rearing in Colombia. **Author**  
786 **contributions.** R.M.M. conceived the project; M.R., A.E.H and R.M.M designed the  
787 experiments; A.E.H., D.L., L.M. G.R. and R.M.M oversaw the genetic crosses and collected the  
788 behavioral data; C-Y.K. and D.S.W. did the color vision analysis; M.L. arranged the collection  
789 of butterflies in Colombia; M.R., A.E.H and R.M.M analyzed the behavioral data; M.R. and  
790 S.M. analyzed the population genomic data; M.R. collected tissue and analyzed the  
791 transcriptomic data; M.R. and M.M. performed the selective sweep analysis; M.R. and P.A.  
792 performed brain immunostainings; P.A. confocal imaging and image analysis; M.R. performed  
793 the CRISPR-Cas9 and associated experiments; D.S.W. developed the optomotor assay; A.M  
794 performed the patternize analysis; W.O.M., C. P-D, C.S. and R.M.M. provided materials as well  
795 as supervision and insights for data collection and analysis. M.R. and R.M.M. wrote the paper  
796 with input from all authors.

797

## 798 **References**

- 799 1. I. C. Cuthill, W. L. Allen, K. Arbuckle, B. Caspers, G. Chaplin, M. E. Hauber, G. E. Hill, N. G. Jablonski, C.  
800 D. Jiggins, A. Kelber, J. Mappes, J. Marshall, R. Merrill, D. Osorio, R. Prum, N. W. Roberts, A. Roulin, H. M.  
801 Rowland, T. N. Sherratt, J. Skelhorn, M. P. Speed, M. Stevens, M. C. Stoddard, D. Stuart-Fox, L. Talas, E.  
802 Tibbetts, T. Caro, The biology of color. *Science*. **357**, eaan0221 (2017).
- 803 2. U. Knief, C. M. Bossu, N. Saino, B. Hansson, J. Poelstra, N. Vijay, M. Weissensteiner, J. B. W. Wolf, Epistatic  
804 mutations under divergent selection govern phenotypic variation in the crow hybrid zone. *Nat Ecol Evol.* **3**,  
805 570–576 (2019).
- 806 3. V. Ficarrota, J. J. Hanly, L. S. Loh, C. M. Francescutti, A. Ren, K. Tunström, C. W. Wheat, A. H. Porter, B. A.  
807 Counterman, A. Martin, A genetic switch for male UV iridescence in an incipient species pair of sulphur  
808 butterflies. *Proceedings of the National Academy of Sciences*. **119**, e2109255118 (2022).
- 809 4. M. Liang, W. Chen, A. M. LaFountain, Y. Liu, F. Peng, R. Xia, H. D. Bradshaw, Y.-W. Yuan, Taxon-specific,  
810 phased siRNAs underlie a speciation locus in monkeyflowers. *Science*. **379**, 576–582 (2023).
- 811 5. S. M. V. Belleghem, A. A. Ruggieri, C. Concha, L. Livraghi, L. Hebberecht, E. S. Rivera, J. G. Ogilvie, J. J.  
812 Hanly, I. A. Warren, S. Planas, Y. Ortiz-Ruiz, R. Reed, J. J. Lewis, C. D. Jiggins, B. A. Counterman, W. O.  
813 McMillan, R. Papa, High level of novelty under the hood of convergent evolution. *Science* (2023).
- 814 6. S. Ansai, K. Mochida, S. Fujimoto, D. F. Mokodongan, B. K. A. Sumarto, K. W. A. Masengi, R. K. Hadiaty, A.  
815 J. Nagano, A. Toyoda, K. Naruse, K. Yamahira, J. Kitano, Genome editing reveals fitness effects of a gene for  
816 sexual dichromatism in Sulawesian fishes. *Nat Commun.* **12**, 1350 (2021).
- 817 7. M. A. Gazda, P. M. Araújo, R. J. Lopes, M. B. Toomey, P. Andrade, S. Afonso, C. Marques, L. Nunes, P.  
818 Pereira, S. Trigo, G. E. Hill, J. C. Corbo, M. Carneiro, A genetic mechanism for sexual dichromatism in birds.  
819 *Science*. **368**, 1270–1274 (2020).
- 820 8. M. Unbehend, G. M. Kozak, F. Koutroumpa, B. S. Coates, T. Dekker, A. T. Groot, D. G. Heckel, E. B.  
821 Dopman, bric à brac controls sex pheromone choice by male European corn borer moths. *Nat Commun.* **12**,  
822 2818 (2021).
- 823 9. P. Brand, I. A. Hinojosa-Díaz, R. Ayala, M. Daigle, C. L. Yurrita Obiols, T. Eltz, S. R. Ramírez, The evolution  
824 of sexual signaling is linked to odorant receptor tuning in perfume-collecting orchid bees. *Nat Commun.* **11**,  
825 244 (2020).
- 826 10. O. M. Ahmed, A. Avila-Herrera, K. M. Tun, P. H. Serpa, J. Peng, S. Parthasarathy, J.-M. Knapp, D. L. Stern,  
827 G. W. Davis, K. S. Pollard, N. M. Shah, Evolution of Mechanisms that Control Mating in *Drosophila* Males.  
828 *Cell Reports*. **27**, 2527-2536.e4 (2019).
- 829 11. R. Merrill, P. Rastas, S. H. Martin, M. C. Melo, S. Barker, J. Davey, W. O. McMillan, C. D. Jiggins, Genetic  
830 dissection of assortative mating behavior. *PLoS Biol.* **17**, e2005902-21 (2019).
- 831 12. M. R. Kronforst, D. D. Kapan, C. McNeely, R. J. O'Neill, L. E. Gilbert, Linkage of butterfly mate preference  
832 and wing color preference cue at the genomic location of wingless. *Proceedings of the National Academy of*  
833 *Sciences*. **103**, 6575–6580 (2006).

- 834 13. S. R. Pryke, Sex Chromosome Linkage of Mate Preference and Color Signal Maintains Assortative Mating  
835 Between Interbreeding Finch Morphs. *Evolution*. **64**, 1301–1310 (2010).
- 836 14. N. L. Chamberlain, R. I. Hill, D. D. Kapan, L. E. Gilbert, M. R. Kronforst, Polymorphic Butterfly Reveals the  
837 Missing Link in Ecological Speciation. *Science*. **326**, 847–850 (2009).
- 838 15. O. Seehausen, Y. Terai, I. S. Magalhaes, K. L. Carleton, H. D. J. Mrosso, R. Miyagi, I. van der Sluijs, M. V.  
839 Schneider, M. E. Maan, H. Tachida, H. Imai, N. Okada, Speciation through sensory drive in cichlid fish.  
840 *Nature*. **455**, 620–626 (2008).
- 841 16. Crane, Imaginal behaviour of a Trinidad butterfly, *Heliconius erato* hydarum Hewitson, with special reference to  
842 the social use of color. *Zoologica*. **40**, 167–196 (1955).
- 843 17. C. D. Jiggins, R. E. Naisbit, R. L. Coe, J. Mallet, Reproductive isolation caused by colour pattern mimicry.  
844 *Nature*. **411**, 302–305 (2001).
- 845 18. R. D. Reed, R. Papa, A. Martin, H. M. Hines, B. A. Counterman, C. Pardo Diaz, C. D. Jiggins, N. L.  
846 Chamberlain, M. R. Kronforst, R. Chen, G. Halder, H. F. Nijhout, W. O. McMillan, optix Drives the Repeated  
847 Convergent Evolution of Butterfly Wing Pattern Mimicry. *Science*. **333**, 1137–1141 (2011).
- 848 19. N. J. Nadeau, C. Pardo Diaz, A. Whibley, M. A. Supple, S. V. Saenko, R. W. R. Wallbank, G. C. Wu, L.  
849 Maroja, L. Ferguson, J. J. Hanly, H. Hines, C. Salazar, R. Merrill, A. J. Dowling, R. H. French-Constant, V.  
850 Llaurens, M. Joron, W. O. McMillan, C. D. Jiggins, The gene cortex controls mimicry and crypsis in butterflies  
851 and moths. *Nature*. **534**, 106–110 (2016).
- 852 20. A. Martin, R. Papa, N. J. Nadeau, R. I. Hill, B. A. Counterman, G. Halder, C. D. Jiggins, M. R. Kronforst, A.  
853 D. Long, W. O. McMillan, R. D. Reed, Diversification of complex butterfly wing patterns by repeated  
854 regulatory evolution of a Wnt ligand. *Proc. Natl. Acad. Sci. U.S.A.* **109**, 12632–12637 (2012).
- 855 21. E. L. Westerman, N. W. VanKuren, D. Massardo, A. Tenger-Trolander, W. Zhang, R. I. Hill, M. Perry, E.  
856 Bayala, K. Barr, N. Chamberlain, T. E. Douglas, N. Buerkle, S. E. Palmer, M. R. Kronforst, Aristaless Controls  
857 Butterfly Wing Color Variation Used in Mimicry and Mate Choice. *Current Biology*. **28**, 3469–3474.e4 (2018).
- 858 22. N. B. Edelman, P. B. Frandsen, M. Miyagi, B. Clavijo, J. Davey, R. B. Dikow, G. García-Accinelli, S. M. Van  
859 Bellegheem, N. Patterson, D. E. Neafsey, R. Challis, S. Kumar, G. R. P. Moreira, C. Salazar, M. Chouteau, B. A.  
860 Counterman, R. Papa, M. Blaxter, R. D. Reed, K. K. Dasmahapatra, M. R. Kronforst, M. Joron, C. D. Jiggins,  
861 W. O. McMillan, F. Di Palma, A. J. Blumberg, J. Wakeley, D. Jaffe, J. Mallet, Genomic architecture and  
862 introgression shape a butterfly radiation. *Science*. **366**, 594–599 (2019).
- 863 23. R. W. R. Wallbank, S. W. Baxter, C. Pardo Diaz, J. J. Hanly, S. H. Martin, J. Mallet, K. K. Dasmahapatra, C.  
864 Salazar, M. Joron, N. Nadeau, W. O. McMillan, C. D. Jiggins, Evolutionary Novelty in a Butterfly Wing  
865 Pattern through Enhancer Shuffling. *PLoS Biol.* **14**, e1002353 (2016).
- 866 24. T. H. G. Consortium, K. K. Dasmahapatra, J. R. Walters, A. D. Briscoe, J. W. Davey, A. Whibley, N. J.  
867 Nadeau, A. V. Zimin, D. S. T. Hughes, L. C. Ferguson, S. H. Martin, C. Salazar, J. J. Lewis, S. Adler, S.-J.  
868 Ahn, D. A. Baker, S. W. Baxter, N. L. Chamberlain, R. Chauhan, B. A. Counterman, T. Dalmay, L. E. Gilbert,  
869 K. Gordon, D. G. Heckel, H. M. Hines, K. J. Hoff, P. W. H. Holland, E. Jacquin-Joly, F. M. Jiggins, R. T.  
870 Jones, D. D. Kapan, P. Kersey, G. Lamas, D. Lawson, D. Mapleson, L. S. Maroja, A. Martin, S. Moxon, W. J.  
871 Palmer, R. Papa, A. Papanicolaou, Y. Pauchet, D. A. Ray, N. Rosser, S. L. Salzberg, M. A. Supple, A.  
872 Surridge, A. Tenger-Trolander, H. Vogel, P. A. Wilkinson, D. Wilson, J. A. Yorke, F. Yuan, A. L. Balmuth, C.

- 873 Eland, K. Gharbi, M. Thomson, R. A. Gibbs, Y. Han, J. C. Jayaseelan, C. Kovar, T. Mathew, D. M. Muzny, F.  
874 Onger, L.-L. Pu, J. Qu, R. L. Thornton, K. C. Worley, Y.-Q. Wu, M. Linares, M. L. Blaxter, R. H. French-  
875 Constant, M. Joron, M. R. Kronforst, S. P. Mullen, R. D. Reed, S. E. Scherer, S. Richards, J. Mallet, W. O.  
876 McMillan, C. D. Jiggins, Butterfly genome reveals promiscuous exchange of mimicry adaptations among  
877 species. *Nature*. **487**, 94–98 (2012).
- 878 25. R. Merrill, B. Van Schooten, J. A. Scott, C. D. Jiggins, Pervasive genetic associations between traits causing  
879 reproductive isolation in *Heliconius* butterflies. *Proceedings of the Royal Society B: Biological Sciences*. **278**,  
880 511–518 (2011).
- 881 26. M. Rossi, A. E. Hausmann, T. J. Thurman, S. H. Montgomery, R. Papa, C. D. Jiggins, W. O. McMillan, R. M.  
882 Merrill, Visual mate preference evolution during butterfly speciation is linked to neural processing genes. *Nat*  
883 *Commun.* **11**, 4763 (2020).
- 884 27. C. Pardo-Diaz, C. Salazar, S. W. Baxter, C. Merot, W. Figueiredo-Ready, M. Joron, W. O. McMillan, C. D.  
885 Jiggins, Adaptive Introgression across Species Boundaries in *Heliconius* Butterflies. *PLOS Genetics*. **8**,  
886 e1002752 (2012).
- 887 28. S. H. Martin, J. W. Davey, C. D. Jiggins, Evaluating the Use of ABBA–BABA Statistics to Locate Introgressed  
888 Loci. *Molecular Biology and Evolution*. **32**, 244–257 (2015).
- 889 29. S. H. Martin, J. W. Davey, C. Salazar, C. D. Jiggins, Recombination rate variation shapes barriers to  
890 introgression across butterfly genomes. *PLOS Biology*. **17**, e2006288 (2019).
- 891 30. S. H. Martin, S. M. Van Belleghem, Exploring Evolutionary Relationships Across the Genome Using Topology  
892 Weighting. *Genetics*. **206**, 429–438 (2017).
- 893 31. M. DeGiorgio, C. D. Huber, M. J. Hubisz, I. Hellmann, R. Nielsen, SweepFinder2: increased sensitivity,  
894 robustness and flexibility. *Bioinformatics*. **32**, 1895–1897 (2016).
- 895 32. C. Mérot, B. Frérot, E. Leppik, M. Joron, Beyond magic traits: Multimodal mating cues in *Heliconius*  
896 butterflies. *Evolution*. **69**, 2891–2904 (2015).
- 897 33. J. I. Meier, R. B. Stelkens, D. A. Joyce, S. Mwaiko, N. Phiri, U. K. Schlieven, O. M. Selz, C. E. Wagner, C.  
898 Katongo, O. Seehausen, The coincidence of ecological opportunity with hybridization explains rapid adaptive  
899 radiation in Lake Mweru cichlid fishes. *Nat Commun.* **10**, 5391 (2019).
- 900 34. Q. Helleu, C. Roux, K. G. Ross, L. Keller, Radiation and hybridization underpin the spread of the fire ant social  
901 supergene. *Proceedings of the National Academy of Sciences*. **119**, e2201040119 (2022).
- 902 35. D. R. Laetsch, G. Bisschop, S. H. Martin, S. Aeschbacher, D. Setter, K. Lohse, Demographically explicit scans  
903 for barriers to gene flow using gIMble (2023), p. 2022.10.27.514110, , doi:10.1101/2022.10.27.514110.
- 904 36. D. A. Marques, J. I. Meier, O. Seehausen, A Combinatorial View on Speciation and Adaptive Radiation.  
905 *Trends in Ecology & Evolution*. **34**, 531–544 (2019).
- 906 37. M. E. Maan, O. Seehausen, T. G. G. Groothuis, Differential Survival between Visual Environments Supports a  
907 Role of Divergent Sensory Drive in Cichlid Fish Speciation. *Am. Nat.* **189**, 78–85 (2016).

- 908 38. S. H. Montgomery, M. Rossi, W. O. McMillan, R. M. Merrill, Neural divergence and hybrid disruption  
909 between ecologically isolated *Heliconius* butterflies. *PNAS*. **118** (2021), doi:10.1073/pnas.2015102118.
- 910 39. R. M. Merrill, K. K. Dasmahapatra, J. W. Davey, D. D. Dell’Aglia, J. J. Hanly, B. Huber, C. D. Jiggins, M.  
911 Joron, K. M. Kozak, V. Llaurens, S. H. Martin, S. H. Montgomery, J. Morris, N. J. Nadeau, A. L. Pinharanda,  
912 N. Rosser, M. J. Thompson, S. Vanjari, R. W. R. Wallbank, Q. Yu, The diversification of *Heliconius*  
913 butterflies: what have we learned in 150 years? *J. Evol. Biol.* **28**, 1417–1438 (2015).
- 914 40. M. R. Kronforst, L. G. Young, L. E. Gilbert, Reinforcement of mate preference among hybridizing *Heliconius*  
915 butterflies. *Journal of Evolutionary Biology*. **20**, 278–285 (2007).
- 916 41. M. Yamaguchi, Role of regucalcin in calcium signaling. *Life Sciences*. **66**, 1769–1780 (2000).
- 917 42. J. Troscianko, M. Stevens, Image calibration and analysis toolbox – a free software suite for objectively  
918 measuring reflectance, colour and pattern. *Methods in Ecology and Evolution*. **6**, 1320–1331 (2015).
- 919 43. C. A. Schneider, W. S. Rasband, K. W. Eliceiri, NIH Image to ImageJ: 25 years of image analysis. *Nat*  
920 *Methods*. **9**, 671–675 (2012).
- 921 44. K. J. McCulloch, F. Yuan, Y. Zhen, M. L. Aardema, G. Smith, J. Llorente-Bousquets, P. Andolfatto, A. D.  
922 Briscoe, Sexual Dimorphism and Retinal Mosaic Diversification following the Evolution of a Violet Receptor  
923 in Butterflies. *Molecular Biology and Evolution*. **34**, 2271–2284 (2017).
- 924 45. G. Zaccardi, A. Kelber, M. P. Sison-Mangus, A. D. Briscoe, Color discrimination in the red range with only  
925 one long-wavelength sensitive opsin. *Journal of Experimental Biology*. **209**, 1944–1955 (2006).
- 926 46. K. J. McCulloch, D. Osorio, A. D. Briscoe, Sexual dimorphism in the compound eye of *Heliconius erato*: a  
927 nymphalid butterfly with at least five spectral classes of photoreceptor. *J. Exp. Biol.* **219**, 2377–2387 (2016).
- 928 47. M. Vorobyev, D. Osorio, Receptor noise as a determinant of colour thresholds. *Proceedings of the Royal*  
929 *Society of London. Series B: Biological Sciences*. **265**, 351–358 (1998).
- 930 48. A. Siddiqi, T. W. Cronin, E. R. Loew, M. Vorobyev, K. Summers, Interspecific and intraspecific views of color  
931 signals in the strawberry poison frog *Dendrobates pumilio*. *Journal of Experimental Biology*. **207**, 2471–2485  
932 (2004).
- 933 49. K. J. McCulloch, A. Macias-Muñoz, A. Mortazavi, A. D. Briscoe, Multiple Mechanisms of Photoreceptor  
934 Spectral Tuning in *Heliconius* Butterflies. *Molecular Biology and Evolution*. **39**, msac067 (2022).
- 935 50. D. A. Elston, R. Moss, T. Boulinier, C. Arrowsmith, X. Lambin, Analysis of aggregation, a worked example:  
936 numbers of ticks on red grouse chicks. *Parasitology*. **122**, 563–569 (2001).
- 937 51. S. H. Martin, K. K. Dasmahapatra, N. J. Nadeau, C. Salazar, J. R. Walters, F. Simpson, M. Blaxter, A. Manica,  
938 J. Mallet, C. D. Jiggins, Genome-wide evidence for speciation with gene flow in *Heliconius* butterflies.  
939 *Genome Res.* **23**, 1817–1828 (2013).
- 940 52. P. Jay, A. Whibley, L. Frézal, M. Á. Rodríguez de Cara, R. W. Nowell, J. Mallet, K. K. Dasmahapatra, M.  
941 Joron, Supergene Evolution Triggered by the Introgression of a Chromosomal Inversion. *Current Biology*. **28**,  
942 1839-1845.e3 (2018).

- 943 53. J. W. Davey, M. Chouteau, S. L. Barker, L. Maroja, S. W. Baxter, F. Simpson, R. Merrill, M. Joron, J. Mallet,  
944 K. K. Dasmahapatra, C. D. Jiggins, Major Improvements to the *Heliconius melpomene* Genome Assembly  
945 Used to Confirm 10 Chromosome Fusion Events in 6 Million Years of Butterfly Evolution. *G3*. **6**, 695–708  
946 (2016).
- 947 54. H. Li, R. Durbin, Fast and accurate long-read alignment with Burrows-Wheeler transform. *Bioinformatics*. **26**,  
948 589–595 (2010).
- 949 55. A. McKenna, M. Hanna, E. Banks, A. Sivachenko, K. Cibulskis, A. Kernytsky, K. Garimella, D. Altshuler, S.  
950 Gabriel, M. Daly, M. A. DePristo, The Genome Analysis Toolkit: a MapReduce framework for analyzing next-  
951 generation DNA sequencing data. *Genome Res*. **20**, 1297–1303 (2010).
- 952 56. M. Nei, L. Jin, Variances of the average numbers of nucleotide substitutions within and between populations.  
953 *Mol Biol Evol*. **6**, 290–300 (1989).
- 954 57. R. R. Hudson, M. Slatkin, W. P. Maddison, Estimation of levels of gene flow from DNA sequence data.  
955 *Genetics*. **132**, 583–589 (1992).
- 956 58. S. R. Browning, B. L. Browning, Rapid and accurate haplotype phasing and missing-data inference for whole-  
957 genome association studies by use of localized haplotype clustering. *Am J Hum Genet*. **81**, 1084–1097 (2007).
- 958 59. O. Gascuel, BIONJ: an improved version of the NJ algorithm based on a simple model of sequence data. *Mol*  
959 *Biol Evol*. **14**, 685–695 (1997).
- 960 60. S. Guindon, J.-F. Dufayard, V. Lefort, M. Anisimova, W. Hordijk, O. Gascuel, New algorithms and methods to  
961 estimate maximum-likelihood phylogenies: assessing the performance of PhyML 3.0. *Syst Biol*. **59**, 307–321  
962 (2010).
- 963 61. M. Moest, S. M. V. Belleghem, J. E. James, C. Salazar, S. H. Martin, S. L. Barker, G. R. P. Moreira, C. Mérot,  
964 M. Joron, N. J. Nadeau, F. M. Steiner, C. D. Jiggins, Selective sweeps on novel and introgressed variation  
965 shape mimicry loci in a butterfly adaptive radiation. *PLOS Biology*. **18**, e3000597 (2020).
- 966 62. C. D. Huber, M. DeGiorgio, I. Hellmann, R. Nielsen, Detecting recent selective sweeps while controlling for  
967 mutation rate and background selection. *Molecular Ecology*. **25**, 142–156 (2016).
- 968 63. A. Pinharanda, M. Rousselle, S. H. Martin, J. J. Hanly, J. W. Davey, S. Kumar, N. Galtier, C. D. Jiggins,  
969 Sexually dimorphic gene expression and transcriptome evolution provide mixed evidence for a fast-Z effect in  
970 *Heliconius*. *J Evol Biol*. **32**, 194–204 (2019).
- 971 64. A. Dobin, C. A. Davis, F. Schlesinger, J. Drenkow, C. Zaleski, S. Jha, P. Batut, M. Chaisson, T. R. Gingeras,  
972 STAR: ultrafast universal RNA-seq aligner. *Bioinformatics*. **29**, 15–21 (2013).
- 973 65. H. Li, B. Handsaker, A. Wysoker, T. Fennell, J. Ruan, N. Homer, G. Marth, G. Abecasis, R. Durbin, 1000  
974 Genome Project Data Processing Subgroup, The Sequence Alignment/Map format and SAMtools.  
975 *Bioinformatics*. **25**, 2078–2079 (2009).
- 976 66. S. Anders, P. T. Pyl, W. Huber, HTSeq—a Python framework to work with high-throughput sequencing data.  
977 *Bioinformatics*. **31**, 166–169 (2015).



- 978 67. M. I. Love, W. Huber, S. Anders, Moderated estimation of fold change and dispersion for RNA-seq data with  
979 DESeq2. *Genome Biology*. **15**, 550 (2014).
- 980 68. H. Li, Minimap2: pairwise alignment for nucleotide sequences. *Bioinformatics*. **34**, 3094–3100 (2018).
- 981 69. S. Kovaka, A. V. Zimin, G. M. Pertea, R. Razaghi, S. L. Salzberg, M. Pertea, Transcriptome assembly from  
982 long-read RNA-seq alignments with StringTie2. *Genome Biology*. **20**, 278 (2019).
- 983 70. J. G. Doench, N. Fusi, M. Sullender, M. Hegde, E. W. Vaimberg, K. F. Donovan, I. Smith, Z. Tothova, C.  
984 Wilen, R. Orchard, H. W. Virgin, J. Listgarten, D. E. Root, Optimized sgRNA design to maximize activity and  
985 minimize off-target effects of CRISPR-Cas9. *Nat Biotechnol*. **34**, 184–191 (2016).
- 986 71. A. Martin, N. S. Wolcott, L. A. O’Connell, Bringing immersive science to undergraduate laboratory courses  
987 using CRISPR gene knockouts in frogs and butterflies. *J Exp Biol*. **223**, jeb208793 (2020).
- 988 72. N. D. Meecker, S. A. Hutchinson, L. Ho, N. S. Trede, Method for isolation of PCR-ready genomic DNA from  
989 zebrafish tissues. *Biotechniques*. **43**, 610, 612, 614 (2007).
- 990 73. E. M. Caves, J. Troscianko, L. A. Kelley, A customizable, low-cost optomotor apparatus: A powerful tool for  
991 behaviourally measuring visual capability. *Methods in Ecology and Evolution*. **11**, 1319–1324 (2020).
- 992 74. D. S. Wright, A. Manel, M. Guachamin-Rosero, P. Chamba-Vaca, C. N. Bacquet, R. M. Merrill, *bioRxiv*, in  
993 press.
- 994 75. S. M. Van Belleghem, R. Papa, H. Ortiz-Zuazaga, F. Hendrickx, C. D. Jiggins, W. Owen McMillan, B. A.  
995 Counterman, patternize: An R package for quantifying colour pattern variation. *Methods in Ecology and*  
996 *Evolution*. **9**, 390–398 (2018).
- 997 76. J. C. Gower, A General Coefficient of Similarity and Some of Its Properties. *Biometrics*. **27**, 857–871 (1971).
- 998 77. C. R. Hemingson, P. F. Cowman, J. R. Hodge, D. R. Bellwood, Colour pattern divergence in reef fish species is  
999 rapid and driven by both range overlap and symmetry. *Ecology Letters*. **22**, 190–199 (2019).
- 1000 78. J. W. Davey, S. L. Barker, P. M. Rastas, A. Pinharanda, S. H. Martin, R. Durbin, W. O. McMillan, R. Merrill,  
1001 C. D. Jiggins, No evidence for maintenance of a sympatric *Heliconius* species barrier by chromosomal  
1002 inversions. *Evolution Letters*. **1**, 138–154 (2017).

1003  
1004  
1005  
1006  
1007  
1008  
1009  
1010  
1011  
1012  
1013  
1014

1015

Supplementary figures and tables

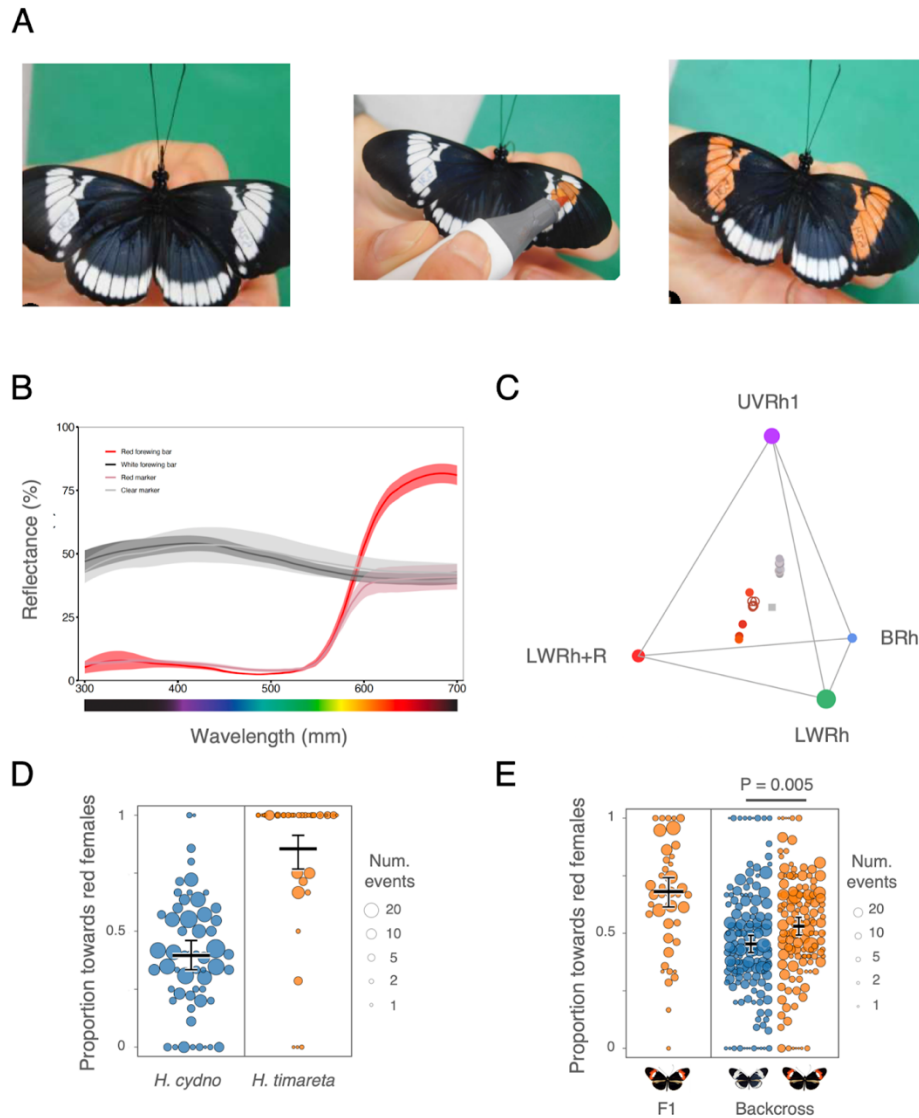

1016

1017

1018 **Fig. S1. Species mating preferences and the behavioral QTL on chromosome 18 are visually guided.**

1019 (A) Manipulation of *H. cydno* female forewing color with a red marker pen (photo credit: Tal Kleinhause

1020 Gedalyahou). (B) Reflectance spectra of the natural red and red-painted forewing bars, as well as of the

1021 white and clear-painted (transparent marker) forewing bars averaged across 4 *Heliconius timareta tristero*,

1022 4 painted *H. cydno cydno*, 9 *H. c. cydno* and 4 painted *H. c. cydno* samples respectively. Shaded regions

1023 represent  $\pm 1$  standard error. (C) Tetrahedral color space, *i.e.*, predicted stimulation of different

1024 photoreceptor cell types, for the different forewing reflectances, using a tetrachromatic model with *H.*

1025 *melpomene* photoreceptor cell sensitivities (49). Corners indicate photoreceptor cell-type maximum

1026 sensitivities: UV-Rhodopsin1 (360 nm), blue-Rhodopsin (470nm), long wavelength-Rhodopsin without

1027 (570nm) and with red filtering pigments (+R) (590nm). Solid circles indicate unmanipulated forewings

1028 (n=5), open circles indicate painted forewings (n=5), and the solid square indicates the achromatic point of

1029 equal stimulation for all photoreceptors. **(D)** Proportion of courtship time directed towards red painted *H.*  
1030 *c. cydno* females relative to white (transparently painted) *H. cydno* females, by *H. timareta* and *H. cydno*  
1031 males, and **(E)** by F1 hybrids and backcross to *H. cydno* hybrid males. Orange points represent individuals  
1032 that are heterozygous (*i.e.*, *H. cyd/H. tim.*) and blue points represent individuals that are homozygous for  
1033 (*i.e.*, *H. cyd./H. cyd.*) *H. cydno* alleles at the *optix* locus on chromosome 18 (and tightly linked regions,  
1034 including the QTL peak). Dot size is scaled to the number of total minutes a male responded to either female  
1035 type. Estimated marginal means and their 95% confidence intervals are displayed with black bars.  
1036  
1037

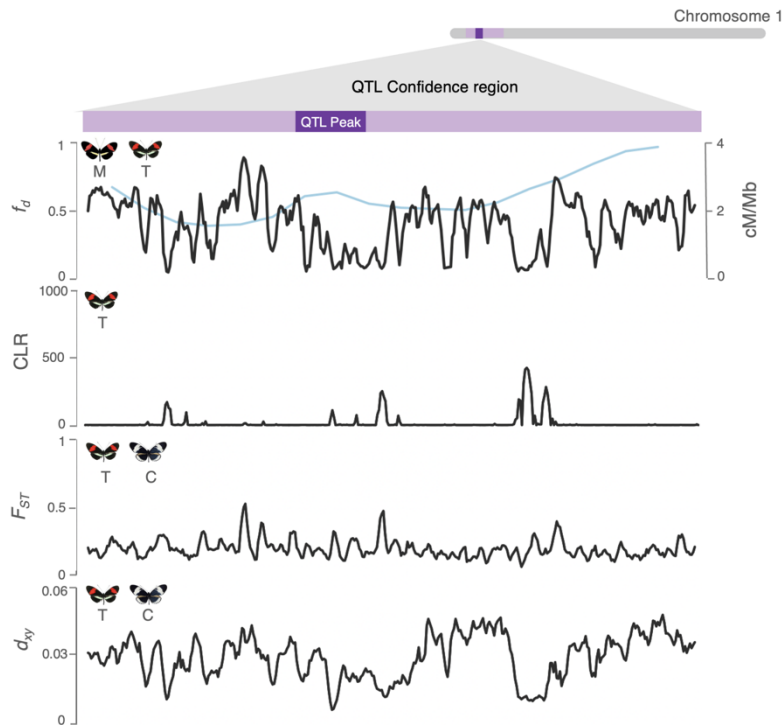

1038

1039 **Fig. S2. Genomic signatures of adaptive introgression and divergence at the behavioral QTL on**  
1040 **chromosome 1.** Top panel: Admixture proportion values between *H. melpomene* and *H. timareta* at the  
1041 behavioral QTL region on chromosome 1. Recombination rates (as estimated in (78)) overlaid in blue.  
1042 Second panel: composite likelihood ratio (CLR) of a selective sweep in *H. timareta*. Third and fourth panels  
1043 display fixation index ( $F_{ST}$ ) and  $d_{xy}$ , between *H. timareta* and *H. cydno*.

1044

1045

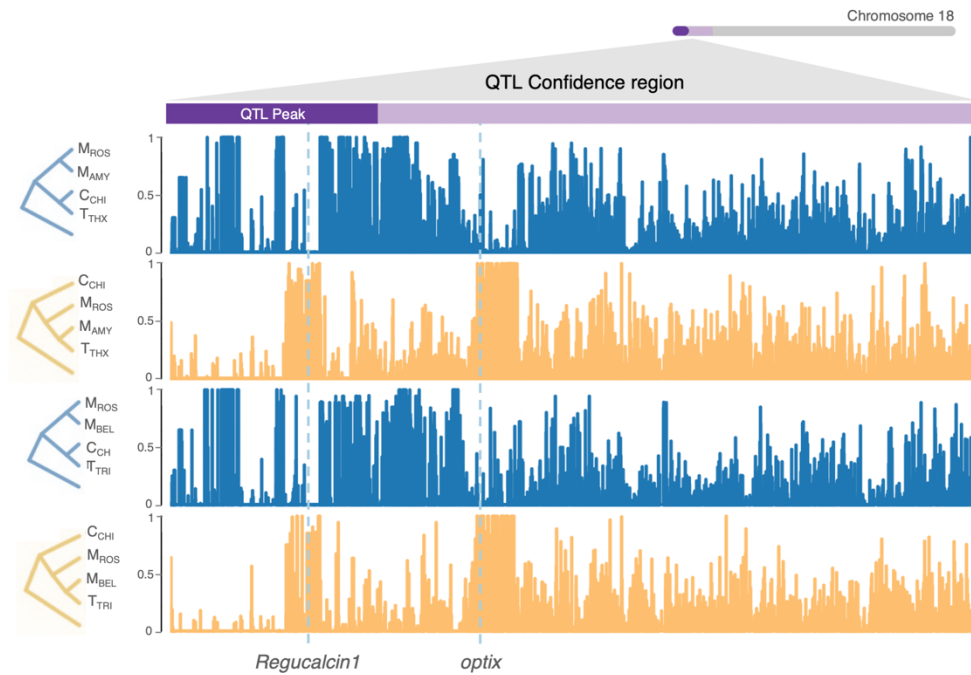

1046  
1047  
1048  
1049  
1050  
1051  
1052  
1053  
1054  
1055  
1056  
1057

**Fig. S3. Sharing of alleles between different populations of red-preferring species at *regucalcin* and *optix*.** Topology weightings, *i.e.*, proportion of a particular phylogenetic tree over all possible rooted trees, along the behavioral QTL region on chromosome 18 (*x*-axis represent physical position). The “species” tree (expected species relationships: *H. timareta* more closely related to *H. cydno* than *H. melpomene*) is represented in blue, the “introgression” tree (where *H. timareta* clusters with its sympatric *H. melpomene* co-mimic) in orange. Top two panels: focal populations of *H. timareta* and *H. melpomene* from Peru (*H. m. amaryllis* and *H. t. thelxinoe*). Bottom panels: focal populations from Colombia (*H. m. bellula* and *H. t. tristero*). *H. numata* was used as outgroup. Gene coordinates of *regucalcin1* (candidate behavioral gene) and *optix* (color pattern gene) are highlighted by vertical light blue dotted lines.

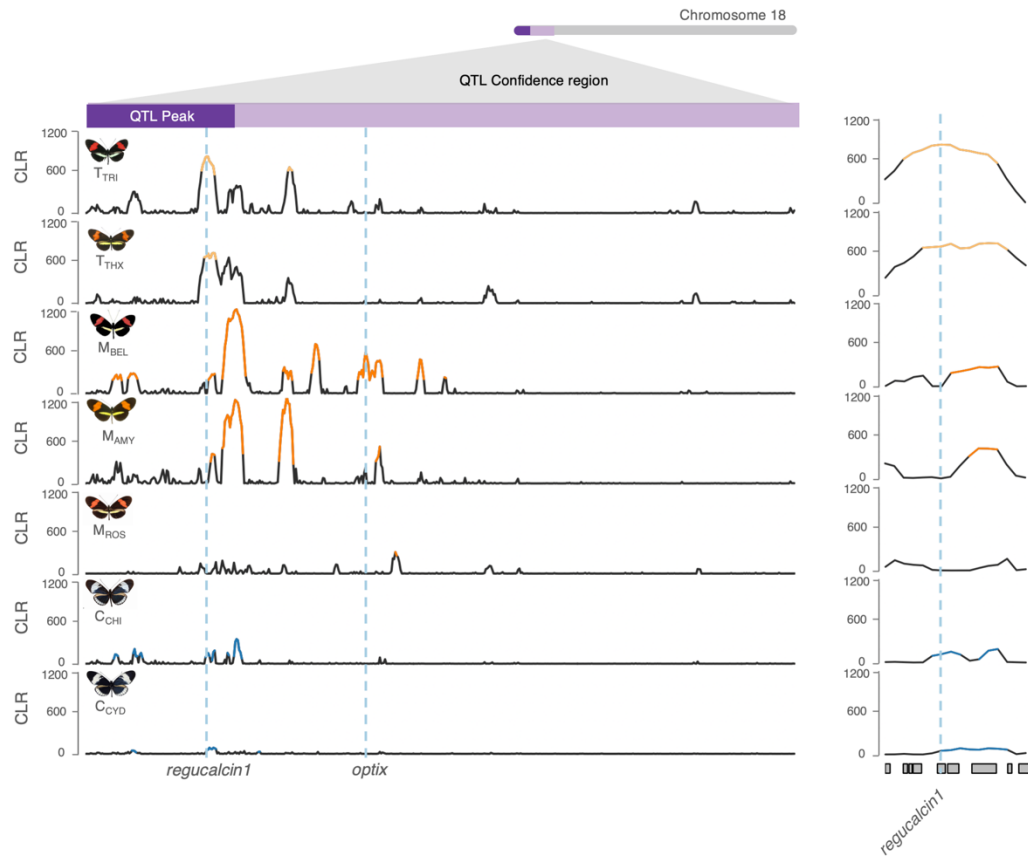

1058  
 1059 **Fig. S4. Evidence for a selective sweep at the *regucalcin* locus across different *Heliconius* populations.**  
 1060 Composite likelihood ratio (CLR) of a selective sweep in different *Heliconius* populations across the QTL  
 1061 region on chromosome 18. Top 1% quantile values are highlighted with colors. Note that i) the highest  
 1062 support for a selective sweep in *H. melpomene* populations is centered at ~100 kb from the *regucalcin* locus  
 1063 and likely represent a more recent selective sweep at a locus other than *regucalcin* ii) the considerably lower  
 1064 absolute CLR score in *H. cydno* populations compared to *H. timareta* populations at *regucalcin* could  
 1065 represent the effect of background selection (removal of deleterious variants), remnants of an old selective  
 1066 sweep or noise instead of positive selection. M<sub>AMY</sub> = *H. melpomene amaryllis* (Peru), M<sub>BEL</sub> = *H. melpomene*  
 1067 *bellula* (Colombia), M<sub>ROS</sub> = *H. melpomene rosina* (Panama), M<sub>MEL</sub> = *H. melpomene melpomene*  
 1068 (Colombia), T<sub>TRI</sub> = *H. timareta tristero* (Colombia), T<sub>THX</sub> = *H. timareta thelxinoe* (Peru), C<sub>CHI</sub> = *H. cydno*  
 1069 *chioneus* (Panama), C<sub>CYD</sub> = *H. cydno cydno* (Colombia).

1070

1071 .

1072

1073

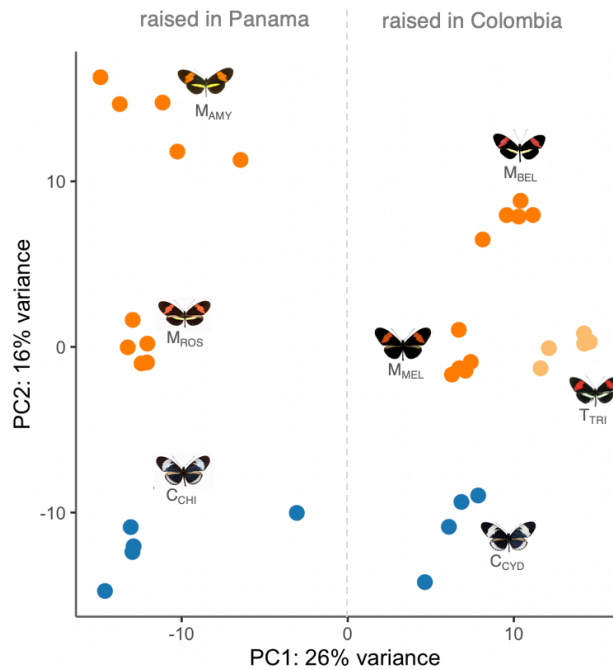

1074  
1075  
1076

1077 **Fig. S5. Brain and eye transcriptomic profiles cluster by rearing environment and species.** Principal  
1078 component analysis (PCA) of gene expression levels for the 500 genes with most variable expression level  
1079 across brain tissue samples from different species. Samples are color-coded by species. A vertical dotted  
1080 line has been drawn to indicate the division (PC1) between individuals that were raised in Panama (*H. c.*  
1081 *chioneus* (C<sub>CHI</sub>) and *H. m. rosina* (M<sub>ROS</sub>) as previously described (26)) and in Colombia. Interestingly, *H.*  
1082 *timareta* clusters more closely to *H. melpomene* (by visual preference phenotype) than to *H. cydno* (by  
1083 phylogeny), suggesting broad convergence in neuro-transcriptomic profiles between sympatric, hybridizing  
1084 populations of *H. melpomene* and *H. timareta*, raised in common garden conditions. M<sub>AMY</sub> = *H. melpomene*  
1085 *amaryllis* (raised in Panama), M<sub>BEL</sub> = *H. melpomene bellula* (raised in Colombia), M<sub>ROS</sub> = *H. melpomene*  
1086 *rosina* (raised in Panama), M = *H. melpomene melpomene* (raised in Colombia), T<sub>TRI</sub> = *H. timareta tristero*  
1087 (raised in Colombia), C<sub>CHI</sub> = *H. cydno chioneus* (raised in Panama), C<sub>CYD</sub> = *H. cydno cydno* (raised in  
1088 Colombia).

1089

1090

1091

1092

1093

1094

1095

1096

1097

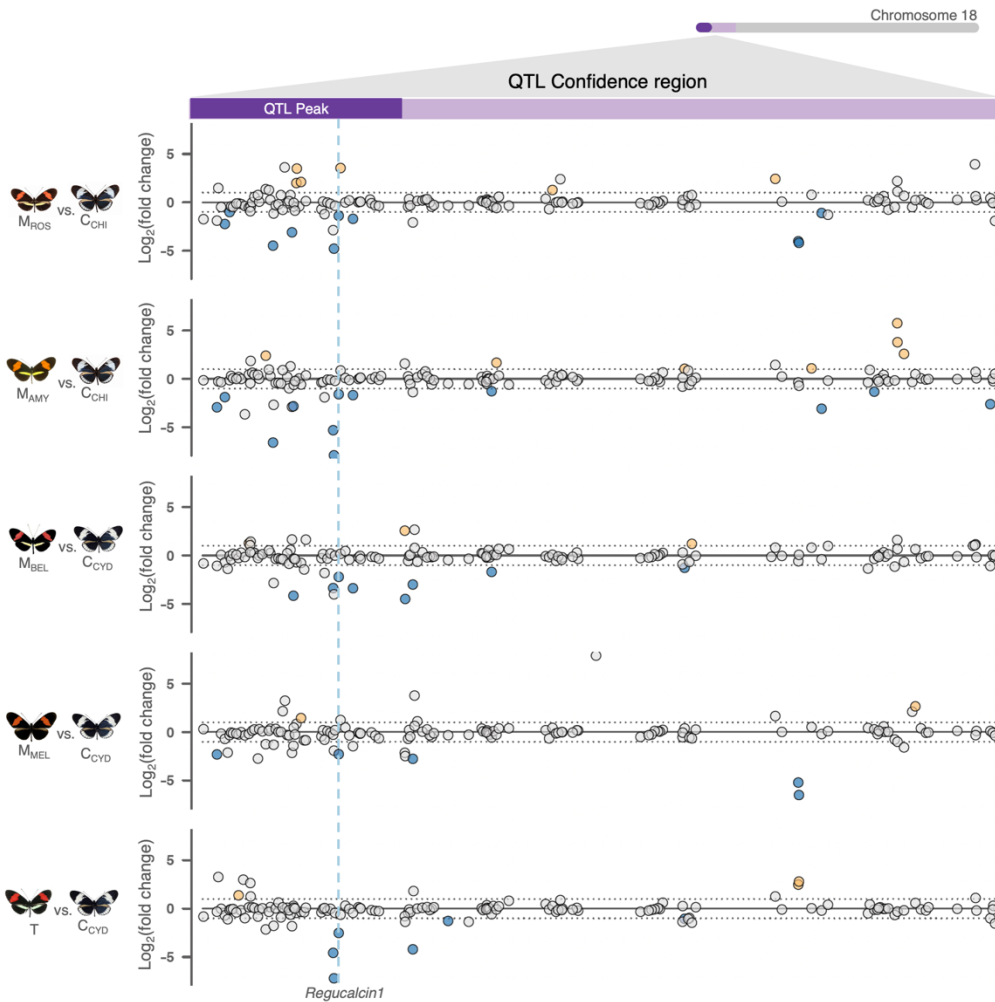

1098

1099 **Fig. S6. Differential expression across populations at the preference QTL region on chromosome 18.**

1100 Points correspond to individual genes and the  $y$ -axis indicates the  $\log_2$  (fold-change) for each “red-

1101 preferring” vs “white preferring” subspecies comparison. The QTL peak, and the rest of the QTL

1102 confidence interval on chromosome 18 are shown on top in dark and light purple respectively ( $x$ -axis

1103 represents physical position). The two horizontal dashed lines (at  $y$ -values of 1 and -1) indicate a 2-fold

1104 change in expression. Genes showing a significant 2-fold+ change in expression level between groups are

1105 highlighted in orange and blue, where orange indicate a 2-fold higher expression level in *H. melpomene*

1106 subspecies or *H. timareta*, whereas blue a 2-fold higher expression level in *H. cydno*. A vertical dashed

1107 blue line highlights the only gene that is differentially expressed between all comparisons: *regucalcin1*

1108 (higher expression level in *H. cydno* populations).  $M_{AMY}$  = *H. melpomene amaryllis* (raised in Panama),

1109  $M_{BEL}$  = *H. melpomene bellula* (raised in Colombia),  $M_{ROS}$  = *H. melpomene rosina* (raised in Panama),  $M$  =

1110 *H. melpomene melpomene* (raised in Colombia),  $T_{TRI}$  = *H. timareta tristero* (raised in Colombia),  $C_{CHI}$  = *H.*

1111 *cydno chioneus* (raised in Panama),  $C_{CYD}$  = *H. cydno cydno* (raised in Colombia).

1112



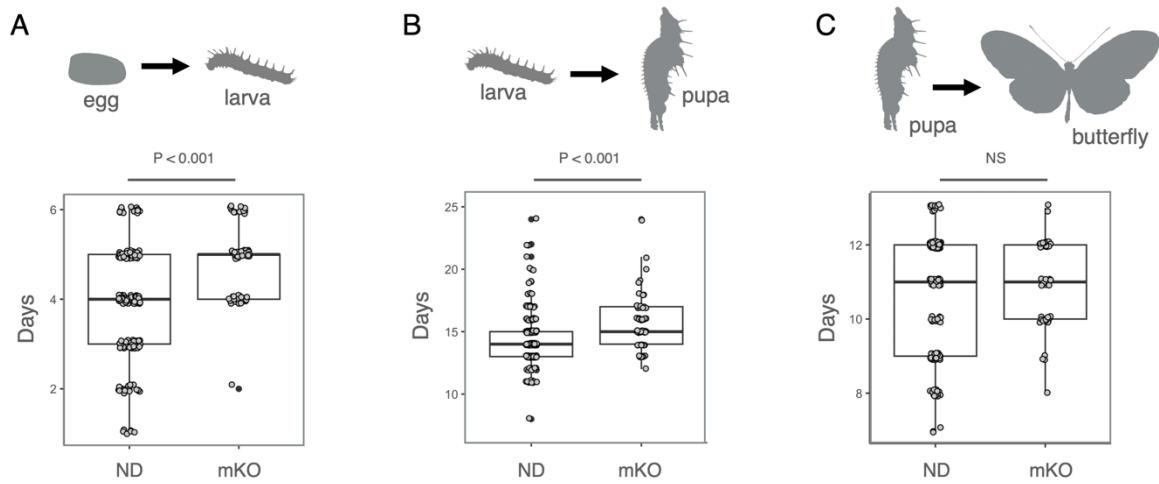

1113

1114 **Fig. S7. CRISPR/Cas9 mediated knock-out of *regucalcin1* delays development in its early stages.** Days  
1115 it took to develop (A) from egg to larva (unpaired *t*-test: P < 0.001) (B) from larva to pupa (unpaired *t*-  
1116 test: P < 0.001) and (C) from pupa to imago (adult) (unpaired *t*-test: P > 0.05) for individuals without  
1117 (ND) and with deletion (mKO) at the *regucalcin1* locus.

1118

1119

1120

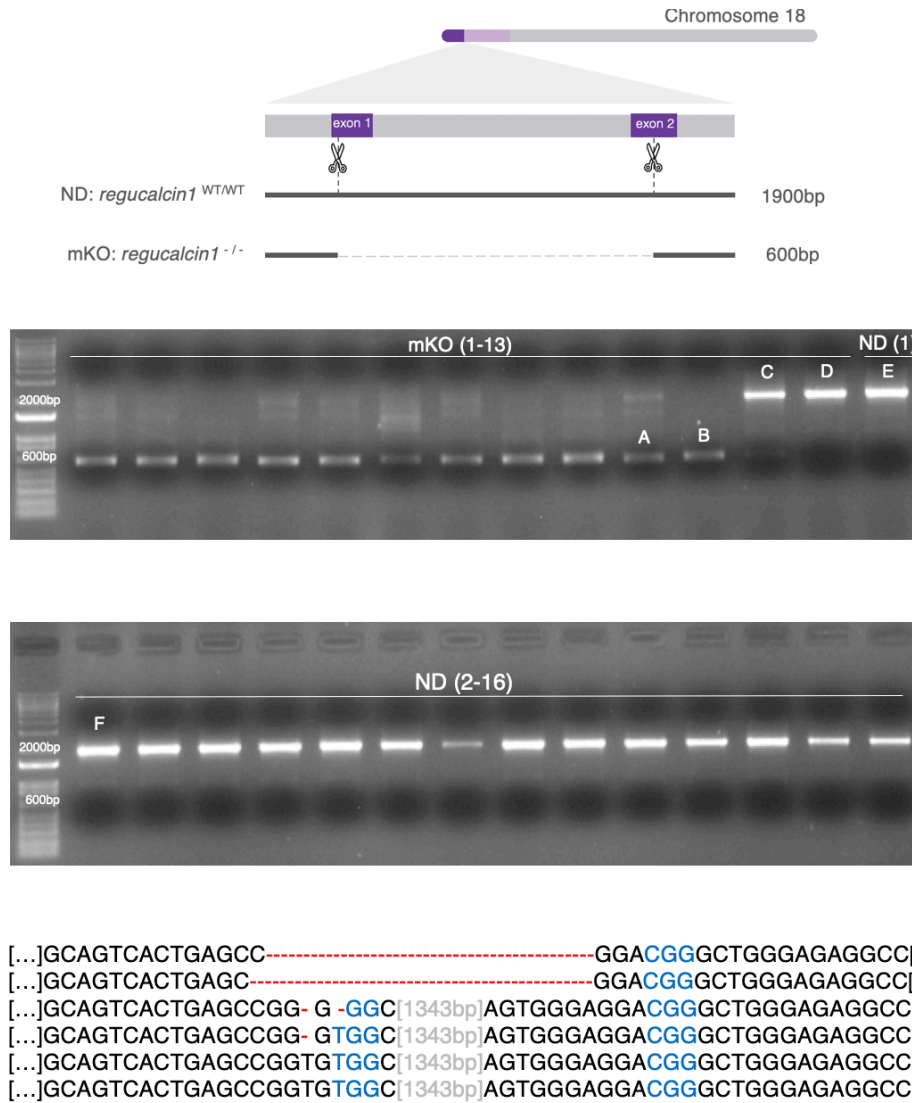

1121  
1122  
1123

1124 **Fig. S8. A high percentage of cells show *regucalcin1* knock-out in G0 mosaic individuals.** On top,  
 1125 schematic representation of the *regucalcin1* locus with the target sites of the small guide RNAs and resulting  
 1126 CRISPR/Cas9-mediated deletion. Below, gel electrophoresis of PCR products of the *regucalcin1* locus  
 1127 from DNA extracted from whole brain tissue of mKO and ND males that were tested in courtship assays  
 1128 (note that 1 ND male sample was not included for space constraints on the gel, and that DNA extraction  
 1129 could not be carried out for 3 ND individuals, whose bodies could not be recovered). Below, examples of  
 1130 nucleotide sequences for alleles carrying and not carrying the deletion (as inferred with Sanger-sequencing  
 1131 of DNA purified from the respective gel bands). Note that for sample mKO 12 (C) there is also a small  
 1132 percentage of cells with deletion, whereas for sample mKO 13 (D) only a single-nucleotide frame-shift  
 1133 mutation.

1134  
1135

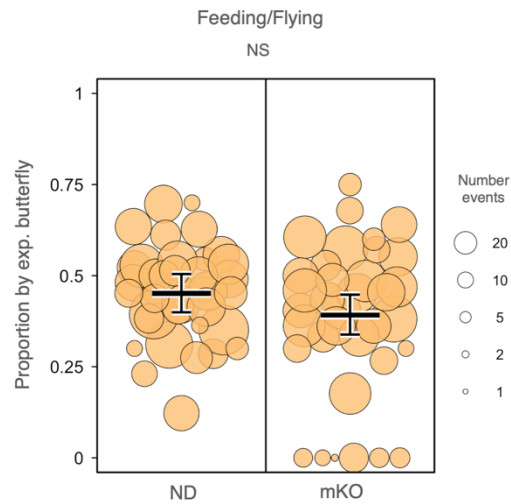

1136  
1137

1138 **Fig. S9. No significant change in flying and feeding behaviors caused by *regucalcin1* knock-out.**  
1139 Proportion of time spent flying and/or feeding by ND individuals (left) and *regucalcin1* mKO individuals  
1140 (right) relative to wild-type butterflies (female and male individual tested, females were tested as of 1-day  
1141 of age). These include four females that did not pass the drop test and (two additional males that) did not  
1142 show any flying or feeding activity (values = 0). Dot size is scaled to the number of total minutes individuals  
1143 flew and/or fed during the experiments.

1144  
1145

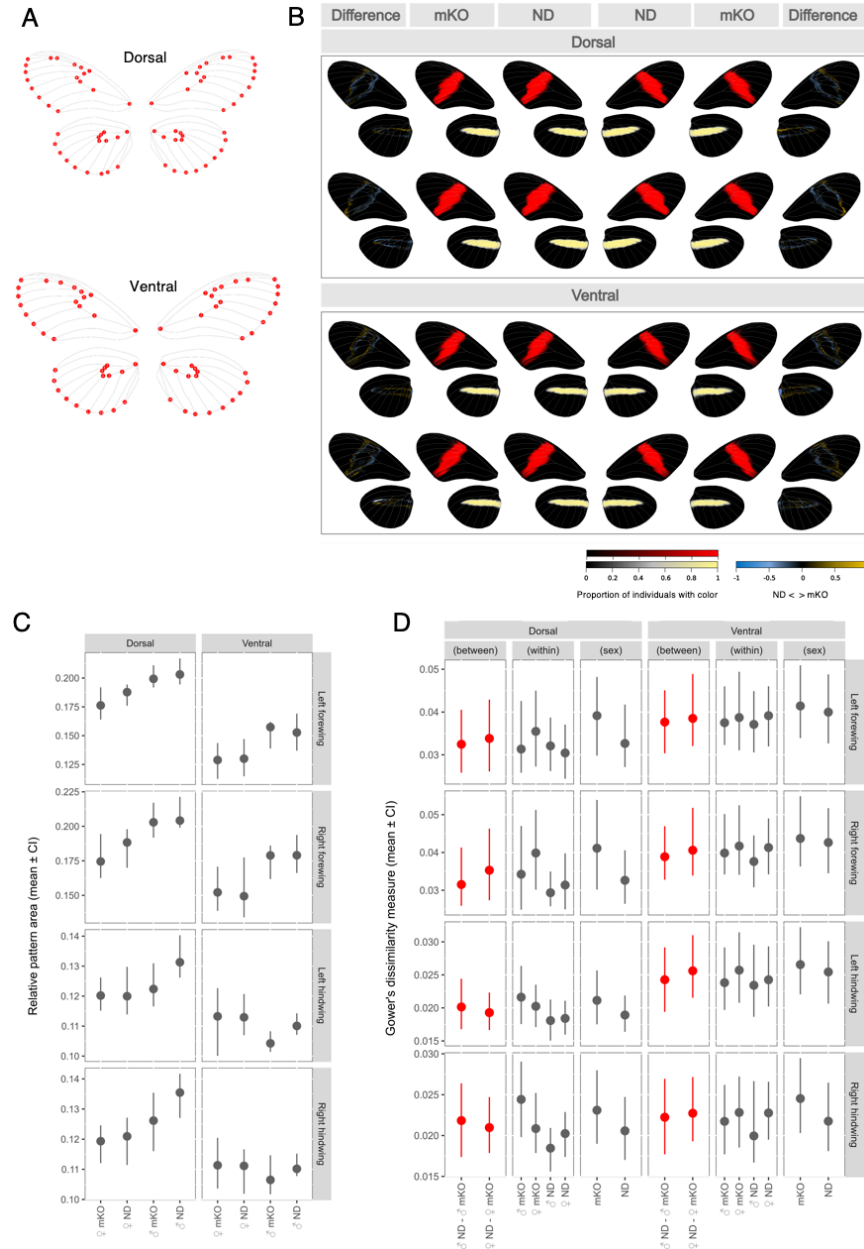

1146

1147

1148

1149

1150

1151

1152

1153

1154

1155

1156

1157

1158

**Fig. S10. No evidence for an effect on color pattern in *regucalcin1* mKO individuals.** (A) Landmarks placed at the intersection of the forewing and hindwing veins for dorsal and ventral wing sides. (B) Average color patterns (central columns) and differences in color pattern (leftmost and rightmost columns) between *H. melpomene rosina* mKO and ND (*i.e.* with and without deletion at *regucalcin1*) individuals, analyzed separately by sex, forewing (FB) and hindwing band (HB), and dorsal and ventral sides (sample sizes: 26 mKO females, 20 mKO males, 23 ND females and 19 ND males). Yellow indicates higher presence of FB/HB in mKO butterflies and blue indicates higher presence of FB/HB in ND butterflies. (C) Average pattern area of FB and HB for each group, with 95% confidence intervals. (D) Mean Gower's dissimilarity measure of FB and HB between-group, within-group and between sex of the same group, with 95% confidence intervals. No significant difference detected.

| # eggs injected | within time (h) | # larvae hatched | % hatched | # DNA extraction worked | # PCR worked | #deletion | % deletion |          |
|-----------------|-----------------|------------------|-----------|-------------------------|--------------|-----------|------------|----------|
| 81              | 2.7 - 3.7       | 7                | 9%        | 3                       | 3            | 2         | 67%        |          |
| 147             | 2.0 - 3.4       | 33               | 22%       | 22                      | 15           | 3         | 20%        |          |
| 163             | 3.6 - 4.3       | 22               | 13%       | 7                       | 7            | 0         | 0%         |          |
| NA              | NA              | NA               | NA        | 7                       | 4            | 1         | 25%        |          |
| 107             | 3.5             | 24               | 22%       | 13                      | 11           | 0         | 0%         |          |
| 70              | 3               | 17               | 24%       | 14                      | 9            | 2         | 22%        |          |
| 76              | 3.6             | 16               | 21%       | 15                      | 15           | 3         | 20%        |          |
| 61              | 1 - 3.5         | 7                | 11%       | 5                       | 5            | 4         | 80%        |          |
| 71              | 2.5 - 3.5       | 14               | 20%       | 12                      | 8            | 6         | 75%        |          |
| 57              | 3               | 15               | 26%       | 13                      | 10           | 2         | 20%        |          |
| 52              | 2-3             | 15               | 29%       | 12                      | 11           | 0         | 0%         |          |
| 121             | 2.7 - 3.6       | 46               | 38%       | 41                      | 32           | 11        | 34%        |          |
| 103             | 2.6             | 37               | 36%       | 33                      | 33           | 12        | 36%        |          |
| 107             | 3.9             | 26               | 24%       | 22                      | 18           | 1         | 5%         |          |
| 99              | 2.6             | 14               | 14%       | 12                      | 12           | 4         | 33%        |          |
| 49              | 3.3             | 7                | 14%       | 7                       | 7            | 0         | 0%         |          |
| 73              | 4.2             | 28               | 38%       | 26                      | 26           | 10        | 38%        |          |
| 70              | 3               | 32               | 46%       | 15                      | 15           | 0         | 0%         |          |
| 63              | 2.8             | 21               | 33%       | 15                      | 13           | 1         | 8%         |          |
|                 |                 |                  |           |                         |              | Tot. 254  | Tot. 62    | Tot. 24% |

1159  
1160  
1161  
1162  
1163  
1164  
1165

**Table S1. Survival and efficiency statistics in CRISPR/Cas9 experiments.** In all the injections above the same concentration and mix of 2 sgRNAs targeting *regucalcin1* were used (see Table S2), with a sgRNA to Cas9 concentration of 250/500 ng/ $\mu$ l.

A

| Chromosome | Orientation | Sequence (5' to 3')  |
|------------|-------------|----------------------|
| 1          | forward     | CGCGCCATAATTTAGACATC |
| 1          | reverse     | TGATAGTCCATACCTGCAAC |
| 1          | forward     | TCATTGATTTTGACCCGACT |
| 1          | reverse     | CATACTCGGCCGTGTTATAC |
| 18         | forward     | GACATGCCAGGCTTCATAAT |
| 18         | reverse     | TGAATTACCTGAGAGCCATC |

B

| Strand/location | Target sequence (5' to 3', PAM not included) |
|-----------------|----------------------------------------------|
| +/exon1         | AAGCAGTCACTGAGCCGGTG                         |
| +/exon2         | GTAGTGGTCGTACAGTGGGA                         |

C

| Purpose          | Orientation | Sequence (5' to 3')  |
|------------------|-------------|----------------------|
| amplify          | forward     | GCTCATGTCCGTTTGTCTAT |
| amplify          | reverse     | ATCGATATCCACCTCCATCA |
| sequence – exon1 | forward     | TTAAATGTGACAGCCGAGTT |
| sequence – exon2 | reverse     | TACCAACAAACAATCTGCCT |

1166  
1167  
1168  
1169  
1170  
1171

**Table S2. Primer and guide RNA sequences.** (A) PCR primer sequences for obtaining genotype information at QTL locations (B) sgRNA sequences for CRISPR knock-outs of *regucalcin1* (C) PCR primer sequences for detecting *regucalcin1* KO occurrence.
